# Supplementary material for: Multiple conserved cell adhesion protein interactions mediate neural wiring of a sensory circuit in C. elegans
Source: eLife. 2017 Sep 13;6:e29257. doi: 10.7554/eLife.29257 (PMC5619950; doi:10.7554/eLife.29257)
Supplement: Figure 1—source data 1. [file elife-29257-fig1-data1.xlsx]

## Sheet: Fig1G
Figure 1G. Number of RAB-3 puncta
ind #	wild type	casy-1(tm718)	rig-6(ok1589)	sax-3(ky123)			Statistics: Mann-Whitney test
1	9	6	9	12			Group1	Group2	p-value
2	15	9	11	12			wild type	casy-1(tm718)	0.0005
3	11	8	9	14			wild type	rig-6(ok1589)	0.0088
4	15	13	10	12			wild type	sax-3(ky123)	<0.0001
5	17	10	13	17
6	14	12	8	14
7	15	0	13	15
8	14	0	0	19
9	12	12	12	17
10	13	11	9	16
11	12	8	9	16
12	11	7	8	19
13	11	9	15	20
14	11	9	12	23
15	11	16	14	10
16	9	10	8	15
17	15	7	16	18
18	17	14	13	19
19	10	16	6	21
20	13	14	12	16
21	13	16	12	13
22	12	8	12	19
23	14	12	13	15
24	16	11	14	21
25	12	9	9	17
26	13	12	0	22
27	15	11	15	12
28	10	10	12	22
29	14	9	11	25
30	11	9	9	15

## Sheet: Fig1I
Figure 1I. % contact of HOA-AVG axons
ind #	wild type	casy-1(tm718)	rig-6(ok1589)			Statistics: Mann-Whitney test
1	100	30.8638	63.2096			Group1	Group2	p-value
2	100	48.8937	74.4661			wild type	casy-1(tm718)	<0.0001
3	100	71.0799	85.231			wild type	rig-6(ok1589)	<0.0001
4	100	100	100
5	85.405	0	82.3501
6	100	31.8301	25.3034
7	100	35.0268	83.3171
8	80.6798	90.3695	100
9	100	50.6333	76.8898
10	100	100	40.1136
11	100	52.0904	74.8885
12	85.5045	58.3419	69.9077
13	100	77.9576	100
14	100	23.816	79.9035
15	100	100	13.9045
16	100	72.6058	30.4699
17	84.9019	0	59.2245
18	100	13.5144	77.3199
19	100	64.3666	100
20	100	56.6767	100
21	100	71.488	89.8646
22	100	90.3096	81.9422
23	81.4642	41.1885	82.2788
24	78.68	69.4948	0
25	92.3295	100	100
26	100	59.1945	88.0422
27	100	89.5055	79.6289
28	100	100	43.7606
29	100	35.8729	78.4828
30	100	82.4469	100
31	100	41.0875	81.6893
32	100	100	77.622
33	100	82.7262	74.9156
34	100	24.8688	100
35	85.5219	62.8722	44.0519
36	89.6488	65.0963	55.5503
37	100	82.0158	77.2811
38	100	83.6321	100
39	100	77.5234	36.9892
40	100	71.3427	79.4636

## Sheet: Fig1J
Figure 1J. RAB-3 puncta size (um)
	wild type		casy-1(tm718)		rig-6(ok1589)				Statistics: Mann-Whitney test
Contact	+	-	+	-	+	-				Group1	Group2	p-value
obj #									wild type	contact (+)	contact (-)	<0.0001
1	0.657891	0.607627	2.08042	1.15063	2.01835	1.00926			casy-1(tm718)	contact (+)	contact (-)	<0.0001
2	1.61353	0.752673	1.35392	1.28642	1.97367	1.12829			rig-6(ok1589)	contact (+)	contact (-)	<0.0001
3	0.999681	0.535184	1.42716	0.67273	2.30126	1.12829
4	1.4712	1.66012	2.28467	0.752194	2.01835	1.12829
5	0.677038	1.58146	1.59566	1.27653	2.14074	0.774374
6	1.00926	0.767034	1.76241	0.638264	2.72666	0.810117
7	1.45588	0.951492	2.17026	0.752194	1.27653	0.531833
8	1.42716	0.752194	2.09877	1.04771	1.92804	0.752194
9	0.999681	1.16164	1.64289	0.425563	1.07037	2.37211
10	1.61545	1.4712	1.27653	0.774374	1.86772	1.86086
11	2.0434	1.11696	2.6413	0.908888	1.21525	1.69619
12	0.735599	2.12893	1.57157	0.810117	0.859263	1.4712
13	1.56742	0.97064	2.13818	0.980692	1.97367	1.15063
14	1.04021	0.930429	1.81155	1.31578	0.813627	1.42716
15	1.81937	1.36333	1.78315	1.281	1.4712	1.77054
16	0.756822	1.76241	1.43115	0.857667	2.07436	0.83086
17	1.43609	1.16164	1.44694	0.504548	1.64289	2.0434
18	1.46673	1.60364	1.73177	0.752194	2.37211	1.13084
19	1.51795	1.57157	1.21286	1.15063	0.97064	0.957396
20	0.638264	0.97064	1.06383	0.79783	1.73177	0.902665
21	2.23536	1.75523	1.76081	0.67273	1.71533	1.16164
22	2.01995	1.62725	1.15063	0.857667	1.91782	0.951492
23	2.23392	1.21286	2.71725	0.908888	1.59917	0.752194
24	1.52417	1.52306	1.73177	1.41918	1.38296	1.38296
25	1.57157	1.00926	2.41168	1.38296	2.09542	1.38695
26	1.91479	0.713579	1.85783	1.06909	1.9266	0.902665
27	1.6831		1.20345	1.20345	3.21956	1.62374
28	2.61337		2.05441	0.850965	2.17026	1.80836
29	1.83676		1.83022	0.677038	2.0434	0.902665
30	2.03096		2.27653	1.44694	1.99936	0.752194
31	1.48173		1.36221	1.65135	1.94782	1.86086
32	2.92102		1.71533	0.638264	2.71725	0.774374
33	2.42812		2.15398	0.601723	2.48221	0.83086
34	1.42716		1.38695	0.83086	3.543	0.857667
35	2.62725		2.3619	0.857667	1.80533	2.15398
36	1.21286		3.35472	0.752194	4.40179	1.62374
37	1.58146		4.67704	1.08489	1.94782	0.67273
38	2.0434		1.21286	0.767034	1.16164	1.24621
39	1.06383		3.53614	1.21286	2.13818	1.59566
40	4.96218		1.04771	0.79783	0.857667	0.67273
41	1.43115		1.85783	1.68199	1.91782	0.681187
42	3.35472		2.48332	1.43115	1.04771	0.744694
43	4.67704		1.9266	0.767034	1.08489	0.83086
44	1.21286		0.744694	1.09526	2.98053	2.02393
45	3.53614		1.0217	1.68199	1.24063	1.31578
46	1.04771		1.281	0.83086	2.37865	1.04771
47	1.85783		0.908888	1.91782	1.91479	1.09526
48	2.48332		1.59917	1.21286	1.75443	1.50439
49	1.9266		1.34562		1.88495	0.572842
50	0.744694		1.36221		1.90298	1.20345
51	2.07436		1.91479		1.42716	1.52306
52	2.13021		0.752194		2.04627	1.05314
53	1.48923		0.980693		2.29137	1.1701
54	2.13021		0.9633		2.59039	1.04771
55	0.681187		1.85783		1.38695
56	2.3619		0.744694		1.41918
57	0.752194		1.24621		2.99569
58	2.56183		1.68199		2.43051
59	1.70209		2.39046		1.59566
60	2.8165		1.91479		1.36221
61	2.03239		0.857667		1.42716
62	1.281		2.75969		1.73177
63	2.573		1.80836		2.11154
64	1.49306		1.09526		3.46338
65	2.03239		2.34035		3.25626
66	3.23536		1.281		2.51061
67	1.59917		1.90298		1.43115
68	2.09813		1.59566		0.902665
69	1.83628		2.43051		0.752194
70	2.12749		2.34993		1.00351
71	1.18941		2.97862		1.28642
72	2.02393		0.713579		1.39923
73	2.04627		2.02393		1.1701
74	3.19132		1.38296		1.91782
75	1.77054		1.91782		3.09223
76	2.25658		2.76783		4.30796
77	0.930429		1.281		1.09526
78	1.38296		2.03239		2.22116
79	1.11058		1.57157		2.99745
80	2.0434		2.04627		2.90346
81	2.06542		4.07723		2.43561
82	0.767034		1.49306		1.20345
83	1.91782		1.29855		1.33285
84	0.980692		1.50439		2.25658
85	1.68199		1.70528		1.80836
86	1.78315		1.81778		1.80836
87	1.80836		1.4779		2.93458
88	1.52306		1.44694		2.84091
89	0.774374		2.1468		2.11154
90	1.43115		1.62023		3.2001
91	2.21669		1.44694		2.92676
92	2.24398		1.43115		2.48332
93	1.34562		1.9558		3.61688
94	2.8741		1.39923		3.38487
95	2.89373		1.2853		2.57508
96	2.48332		1.06383		4.90378
97	1.95277		1.17504		3.02569
98	2.48109		1.44694		2.1827
99	1.21286		1.281		1.51189
100	2.11154		1.00926		2.19052
101	1.97878		1.06383		1.62725
102	0.930429		0.877134		1.15063
103	1.11058		1.71533		1.13084
104	1.41918		2.15127		2.02393
105	1.29408		0.638264		0.9633
106	1.38695		1.24509		2.14074
107	1.18941		1.57061		2.09542
108	1.70209		1.38296		2.15127
109	1.281		1.1701		2.15398
110	1.49306		1.78315		1.281
111	1.70209		1.38695		2.09813
112	2.24398		1.31578		2.07436
113	0.857667		1.0217		4.15414
114	1.29408		1.14568		2.37865
115	1.27653		1.06383		1.81155
116	1.17504		2.28403		2.13818
117	0.850965		0.980693		1.82081
118	2.44088		1.78315		2.29137
119	2.27653		1.53423		2.04627
120	0.857667		1.42716		1.21286
121	1.65486		1.04771		1.98724
122	0.951492		1.58146		1.08489
123	1.50439		1.83022		2.03239
124	1.97878		1.38296		2.55306
125	0.857667		2.37865		1.39923
126	1.91782		0.752194		1.81937
127	1.86086		0.767034		1.65486
128	1.53423		1.53423		1.53423
129	1.42716		1.91479		1.36221
130	1.88208		1.9558		1.35392
131	0.915111		1.09526		1.96155
132	1.59917		2.28403		1.50439
133	1.90298		1.89405		2.19307
134	1.59566		1.49306		2.25658
135	5.54795		2.44902		5.29967
136	3.36397		2.77406		4.6914
137	3.10148		1.12829		2.25658
138	3.14313		1.44694		1.21286
139	1.44694		1.74469		2.04627
140	2.28467		1.36221		1.48173
141	1.00351		1.51189		1.57061
142	2.96713		0.980693		1.91782
143	2.05441		2.33301		1.59917
144	2.34275		2.33301		1.38695
145	1.43115		1.21286		1.09526
146	0.744694		2.0434		1.65135
147	1.06383		2.48332		1.34562
148	1.17504		1.78315		1.43115
149	1.38695		1.2853		1.21286
150	1.39923		2.37211		1.92804
151	0.774374		2.49242		1.29408
152	2.56183		1.72602		2.10611
153	1.33285		2.0434		2.23648
154	1.28642		1.81937		1.68199
155	1.38296		2.14074		2.89373
156	1.65486		2.70799		1.62023
157	1.95277		2.17026		2.39046
158	1.80836		1.15063		1.54891
159	2.57077		2.43561		1.94782
160	1.24509		1.0217		2.59694
161	2.06542		1.86772		1.44694
162	0.850965		2.01835		1.73177
163	1.83022		2.13818		1.86086
164	3.01069		3.76097		2.24398
165	2.61656		1.17504		1.73177
166	2.65949		1.24063		1.88495
167	2.51061		2.12749		2.19307
168	2.39046		1.60364		3.10691
169	0.83086		2.69331
170	0.83086		1.85783
171	1.80836		2.3619
172	0.980692		2.69108
173	1.43115		1.96155
174	1.36221		2.23648
175	1.77054		2.45588
176	1.62725		3.72475
177	1.96155		1.58146
178	2.19307		2.17026
179	2.04627		1.13084
180	1.7447		3.10148
181	1.80836		1.81155
182	1.91782		1.38695
183	2.90554		0.857667
184	0.767034		1.97878
185	2.37211		2.57077
186	2.77406		0.601723
187	1.96155		2.54252
188	1.97878		1.38695
189	1.50439		1.52306
190	1.88208		2.02393
191	2.33301		1.48173
192	0.915111		1.28642
193	2.3619		2.12749
194	1.7447		1.00926
195	1.281		2.04627
196	1.78395		0.915111
197	2.11951		1.71853
198	1.13084		0.744694
199	2.24398		2.0434
200	0.713579		2.16962
201	1.38296		1.24509
202	2.52848		0.930429
203	1.33285		2.03239
204	0.957396		2.62725
205	1.06383		2.80852
206	1.24063		1.9558
207	1.281		3.14122
208	1.48173		1.281
209	1.76081		2.60795
210	1.15063		2.16962
211	1.90298		1.68199
212	1.80836		1.9558
213	0.980692		2.24398
214	0.752194
215	2.73129
216	1.37259
217	1.94782
218	1.86086
219	0.813627
220	1.66587
221	2.37211
222	1.07037
223	2.22243
224	1.42716
225	2.44088
226	1.94128
227	2.4771
228	3.04851
229	3.06925
230	2.43051
231	2.30126
232	1.281
233	1.89405
234	1.59566
235	2.14074
236	3.10148
237	2.02122

## Sheet: Fig1K
Figure 1K. Number of RAB-3 puncta (per 10um)
	wild type		casy-1(tm718)		rig-6(ok1589)				Statistics: Mann-Whitney test
Contact	+	-	+	-	+	-				Group1	Group2	p-value
obj #									wild type	contact (+)	contact (-)	0.0391
1	5.31917	3.81448	3.86982	1.13214	2.75477	3.12351			casy-1(tm718)	contact (+)	contact (-)	0.0255
2	3.14456	0	3.39138	1.31945	3.43759	2.79499			rig-6(ok1589)	contact (+)	contact (-)	0.007
3	3.36917	2.04581	2.74653	3.35134	3.3769	2.4514
4	2.51312	1.41608	2.51312	2.77534	2.51087	3.29967
5	3.51987	2.85289	3.70536	2.9181	2.72003	3.34264
6	2.8355	2.90904	4.87625	3.46748	2.84371	1.74742
7	3.71752		3.68957	2.2655	4.08197	2.05371
8	2.94001		2.44857	1.04628	3.90334	5.09129
9	3.99151		4.34731	1.80912	3.57241	0.93119
10	3.72826		3.78824	4.84144	3.52121	2.27115
11	4.78958		3.94518	3.209	1.50638	1.67334
12	3.21553		2.93504		3.0137	1.27037
13	3.42663		3.56095		3.94514	2.72543
14	3.18544		3.08595		3.03006	1.32341
15	3.14993		3.15603		2.85583
16	2.81529		2.51514		3.37977
17	3.7069		2.81883		3.26223
18	2.64637		3.68311		3.44615
19	2.26554		3.0231
20	4.19342		3.59079

## Sheet: Fig1-supple2B
Figure 1-figure supplement 2B. Number of animals with extra brances
	wild type	sax-3(ky123)			Statistics: Fisher’s exact test
Normal branching	50	25			Group1	Group2	p-value
Extra branching	0	25			wild type	sax-3(ky123)	<0.0001

## Sheet: Fig1-supple3B
Figure 1-figure supplement 3B. Number of RAB-3 puncta
ind #	wild type	rig-6(ok1589)	rig-6(gk438569)			Statistics: Mann-Whitney test
1	9	9	10			Group1	Group2	p-value
2	15	11	12			wild type	rig-6(ok1589)	0.0088
3	11	9	10			wild type	rig-6(gk438569)	0.006
4	15	10	12			rig-6(ok1589)	rig-6(gk438569)	0.8676	ns
5	17	13	10
6	14	8	11
7	15	13	15
8	14	0	9
9	12	12	12
10	13	9	14
11	12	9	11
12	11	8	9
13	11	15	8
14	11	12	8
15	11	14	12
16	9	8	13
17	15	16	9
18	17	13	12
19	10	6	17
20	13	12	12
21	13	12	11
22	12	12	14
23	14	13	7
24	16	14	13
25	12	9	12
26	13	0	14
27	15	15	9
28	10	12	9
29	14	11	8
30	11	9	10
