# Supplementary material for: Multiple conserved cell adhesion protein interactions mediate neural wiring of a sensory circuit in C. elegans
Source: eLife. 2017 Sep 13;6:e29257. doi: 10.7554/eLife.29257 (PMC5619950; doi:10.7554/eLife.29257)
Supplement: Figure 2—source data 1. [file elife-29257-fig2-data1.xlsx]

## Sheet: Fig2E
Figure 2E. % axon-axon contact
HOA-AVG
ind #	wild type	casy-1(tm718)	rig-6(ok1589)	casy-1;rig-6			Statistics: Mann-Whitney test
1	56.5838	86.4126	75.6664	60.1236			Group1	Group2	p-value
2	100	61.8154	100	28.4553			wild type	casy-1(tm718)	<0.0001
3	100	0	100	81.5391			wild type	rig-6(ok1589)	0.003
4	100	0	80.9129	73.84			casy-1;rig-6	casy-1(tm718)	0.0134
5	100	52.6881	87.1296	55.7306			casy-1;rig-6	rig-6(ok1589)	<0.0001
6	100	11.2768	88.7362	73.0057
7	88.755	37.3289	100	17.566
8	100	53.3927	86.2937	0
9	100	75.54	51.1325	66.1109
10	71.5386	77.2397	62.5475	16.9311
11	80.7571	43.6795	70.9686	84.2611
12	100	100	72.2293	61.5595
13	100	86.9247	55.9796	48.9567
14	100	67.0493	79.0412	33.772
15	100	73.9248	54.7829	67.8528
16	100	64.209	72.057	82.3049
17	100	54.1616	88.4317	100
18	84.8246	38.975	80.9677	75.6844
19	85.3574	62.0795	100	48.4788
20	100	79.988	58.58	31.5917
21	89.1874	69.1535	87.8458	35.2511
22	100	66.7511	100	82.5196
23	100	65.0223	69.5816	46.3282
24	97.2551	62.2152	79.1013	66.7982
25	98.1199	57.1686	80.4666	56.9602
26	98.2212	66.5738	67.0823	89.6831
27	100	65.5678	58.919	55.3641
28	49.0087	60.3717	86.1185	50.918
29	71.1481	46.9229	61.2249	63.6363
30	74.1796	64.304	51.5981	43.6979
31	94.0144	86.5437	76.7936	50.5502
32	100	90.3934	0	35.6682
33	92.7772	100	78.5506	55.3232
34	64.3289	55.4862	100	31.3296
35	86.5248	85.5452	75.0652	31.83
36	83.3206	95.7951	53.9924	13.4942
37	69.3131	77.2232	100	55.7053
38	53.2859	42.7109	100	23.4684
39	75.2575	82.5159	73.8495	35.9688
40	59.9158	81.9565	75.4467	60.4219
PHC-AVG
ind #	wild type	casy-1(tm718)	rig-6(ok1589)	casy-1;rig-6			Statistics: Mann-Whitney test
1	57.8674	90.6317	73.3265	50.9322			Group1	Group2	p-value
2	100	77.1774	100	67.3225			wild type	casy-1(tm718)	0.1428	ns
3	100	67.9878	86.8056	74.8552			wild type	rig-6(ok1589)	0.0043
4	88.9509	100	78.7715	81.1797			casy-1;rig-6	casy-1(tm718)	0.0282
5	60.0691	78.049	72.8289	86.5108			casy-1;rig-6	rig-6(ok1589)	0.3563	ns
6	100	71.7131	89.769	82.3474
7	100	68.0156	74.5918	76.6844
8	59.0087	72.9215	88.7814	0
9	61.7443	94.5585	90.732	59.3233
10	84.5586	93.0772	42.177	58.7567
11	57.4041	53.2333	65.9955	94.5026
12	100	88.4091	85.2944	84.4091
13	81.4342	100	53.3318	77.6676
14	80.7509	79.6276	72.2858	93.5271
15	100	100	53.4992	77.7809
16	75.9616	42.0742	74.9988	92.3228
17	100	44.6465	70.7028	83.7265
18	88.2763	100	68.5327	100
19	100	89.3059	77.7544	83.3353
20	75.8172	83.2885	59.9139	63.7786
21	100	90.1885	54.0827	46.6675
22	88.2663	47.8288	74.3664	83.7791
23	73.5839	83.3051	68.3464	22.656
24	77.4214	91.8115	100	29.2345
25	73.9264	94.632	59.3276	84.7874
26	94.7929	48.3525	75.6499	76.3762
27	61.7007	90.359	74.9696	75.871
28	71.8323	70.8799	86.0445	89.0605
29	59.7165	100	94.2594	65.6903
30	100	80.2366	57.1588	67.7856
31	100	82.3937	70.7269	64.8605
32	100	66.1921	57.9535	89.4395
33	80.5485	88.0845	80.3771	40.3822
34	91.7461	89.9289	84.9421	58.3118
35	86.8589	62.9776	87.37	76.7497
36	100	88.1795	71.017	47.9021
37	100	73.5387	100	68.8148
38	87.2904	51.4714	60.918	64.4006
39	24.3014	17.9268	67.8366	61.6763
40	89.9439	93.6583	87.1655	54.8512
HOA-PHC
ind #	wild type	casy-1(tm718)	rig-6(ok1589)	casy-1;rig-6			Statistics: Mann-Whitney test
1	27.5194	87.9997	87.0764	63.7078			Group1	Group2	p-value
2	100	94.052	100	0			wild type	casy-1(tm718)	0.0004
3	82.766	0	88.9955	96.122			wild type	rig-6(ok1589)	0.7127	ns
4	84.7127	0	90.3266	71.7068			casy-1;rig-6	casy-1(tm718)	0.9409	ns
5	52.9716	39.4789	83.9215	69.9282			casy-1;rig-6	rig-6(ok1589)	0.0004
6	100	66.5488	75.6567	86.6633
7	84.2101	68.4937	68.6995	17.566
8	85.334	60.0408	100	0
9	77.1226	79.0038	100	40.0913
10	100	58.7198	34.7231	16.9311
11	29.6525	42.4281	100	91.3402
12	100	100	87.9247	59.7608
13	100	86.9247	61.6605	71.0099
14	91.6474	100	84.8227	61.0588
15	100	73.9248	82.0124	95.2555
16	80.4304	40.2897	60.2097	90.2866
17	100	5.36558	100	90.2369
18	67.6802	32.3563	82.1709	75.6844
19	83.1184	77.0483	87.9995	100
20	75.8024	75.0404	100	55.6618
21	88.0012	40.0207	60.4757	25.8814
22	100	23.0299	87.2386	85.662
23	55.0025	65.741	89.0924	48.0615
24	79.1961	81.0199	100	86.6048
25	73.848	84.903	78.4377	88.2884
26	98.2212	3.02161	66.1451	75.1144
27	84.6198	42.491	63.8188	47.4324
28	69.7733	49.5457	92.9114	66.5658
29	100	67.5955	88.1195	77.5922
30	87.1118	58.454	76.1591	100
31	85.8168	81.3499	54.3325	22.1134
32	86.3311	76.1703	0	34.9979
33	80.5485	100	86.9965	33.5394
34	87.0643	50.9174	72.6947	6.85002
35	85.8096	58.7758	100	57.3362
36	82.0752	91.3001	94.6811	73.562
37	71.4823	47.4718	100	65.5758
38	35.0963	24.0232	67.3699	13.2866
39	10.4206	7.09449	82.6006	41.7317
40	45.8461	73.0591	72.5874	27.1995

## Sheet: Fig2G
Figure 2G. Axon length (um)
	Early L4		Late L4		Adult
ind #	HOA	PHC	HOA	PHC	HOA	PHC
1	0	7.15031	7.45684	34.4908	42.5539	55.2478
2	0	5.61066	5.89437	26.2397	36.1494	45.6325
3	0	2.60491	0	42.2137	31.052	45.2414
4	0	1.29615	5.94798	37.8682	41.1008	52.1452
5	0	4.99362	0	31.2682	34.3721	47.8749
6	0	2.78794	9.13164	23.9553	43.3667	49.0835
7	0	2.90985	22.1738	33.4415	42.7643	43.7966
8	0	2.73512	0	33.0228	39.0836	47.164
9	0	0.94479	0	34.0169	32.8626	49.1146
10	0	2.07946	4.00654	27.2275	24.2654	50.7795
11	0	2.22738	21.304	29.9896	29.3502	49.165
12	0	2.65773	12.2078	28.4825	45.5168	60.7788
13	0	0	8.76528	22.0254	46.9306	49.4777
14	0	0	14.7149	27.2456	39.7061	55.5524
15	0	6.14728	19.3029	39.018	42.9456	55.0648

## Sheet: Fig2I
Figure 2I. % axon-axon contact
HOA-AVG
ind #	mock	PHC ablation			Statistics: Mann-Whitney test
1	88.9229	58.3532			Group1	Group2	p-value
2	78.8062	76.3528			mock	PHC ablation	0.0014
3	67.937	80.6403
4	100	56.8859
5	67.1878	100
6	100	100
7	100	70.4444
8	100	69.107
9	100	54.6169
10	100	74.2394
11	85.5937	100
12	100	62.7057
13	76.2481	55.4565
14	100	43.9404
15	87.1796	19.0997
16	84.805
17	78.6362
18	90.9103
19	100
20	100
PHC-AVG
ind #	mock	HOA ablation			Statistics: Mann-Whitney test
1	67.7259	100			Group1	Group2	p-value
2	89.8928	91.6968			mock	HOA ablation	0.9062	ns
3	91.5076	71.2687
4	100	57.67
5	100	100
6	100	100
7	100	93.6626
8	90.0516	73.5135
9	100	89.714
10	86.8945	83.3232
11	100	100
12	100	100
13	94.3898	100
14	100	100
15	100
16	74.9698
17	73.6113
18	86.765
19	72.4033
20	81.8735
HOA-PHC
ind #	mock	AVG ablation			Statistics: Mann-Whitney test
1	65.9058	94.1705			Group1	Group2	p-value
2	96.0541	100			mock	AVG ablation	0.3177	ns
3	91.5374	87.9556
4	94.3158	83.4826
5	89.8002	95.9076
6	91.1195	70.9695
7	85.2761	94.5089
8	95.8671	91.2277
9	90.4027	79.3041
10	79.4248	49.9443
11	94.5234	81.8546
12	95.7781	58.7725
13	90.403	85.2373
14	100	89.075
15	87.1796	54.958
16	79.3133
17	71.6881
18	90.9103
19	63.0615
20	72.9541

## Sheet: Fig2-supple2B
Figure 2-figure supplement 2B. % axon-axon contact
HOA-AVG
ind #	wild type	rig-6(ok1589)	rig-6(gk438569)			Statistics: Mann-Whitney test
1	56.5838	75.6664	72.3821			Group1	Group2	p-value
2	100	100	77.2696			wild type	rig-6(ok1589)	0.003
3	100	100	92.1999			wild type	rig-6(gk438569)	0.0121
4	100	80.9129	90.1458			rig-6(ok1589)	rig-6(gk438569)	0.3419	ns
5	100	87.1296	72.4818
6	100	88.7362	75.1975
7	88.755	100	80.6757
8	100	86.2937	82.2341
9	100	51.1325	88.1099
10	71.5386	62.5475	58.8984
11	80.7571	70.9686	66.3744
12	100	72.2293	66.3612
13	100	55.9796	85.2536
14	100	79.0412	60.7083
15	100	54.7829	100
16	100	72.057	83.2822
17	100	88.4317	77.5247
18	84.8246	80.9677	81.5616
19	85.3574	100	33.7143
20	100	58.58	100
21	89.1874	87.8458	94.3887
22	100	100	100
23	100	69.5816	79.9722
24	97.2551	79.1013	80.0326
25	98.1199	80.4666	87.4324
26	98.2212	67.0823	81.2308
27	100	58.919	41.9497
28	49.0087	86.1185	100
29	71.1481	61.2249	100
30	74.1796	51.5981	81.185
31	94.0144	76.7936	65.8059
32	100	0	100
33	92.7772	78.5506	86.5911
34	64.3289	100	78.8641
35	86.5248	75.0652	100
36	83.3206	53.9924	100
37	69.3131	100	84.5084
38	53.2859	100	51.5114
39	75.2575	73.8495	71.8456
40	59.9158	75.4467	58.1908
PHC-AVG
ind #	wild type	rig-6(ok1589)	rig-6(gk438569)			Statistics: Mann-Whitney test
1	57.8674	73.3265	79.4344			Group1	Group2	p-value
2	100	100	58.4886			wild type	rig-6(ok1589)	0.0043
3	100	86.8056	55.3693			wild type	rig-6(gk438569)	0.0104
4	88.9509	78.7715	78.1175			rig-6(ok1589)	rig-6(gk438569)	0.4815	ns
5	60.0691	72.8289	91.1584
6	100	89.769	54.1871
7	100	74.5918	68.7116
8	59.0087	88.7814	90.5012
9	61.7443	90.732	68.0522
10	84.5586	42.177	90.7471
11	57.4041	65.9955	97.553
12	100	85.2944	96.6681
13	81.4342	53.3318	83.5682
14	80.7509	72.2858	83.0762
15	100	53.4992	93.8068
16	75.9616	74.9988	80.0574
17	100	70.7028	93.5152
18	88.2763	68.5327	56.9705
19	100	77.7544	75.4652
20	75.8172	59.9139	71.8124
21	100	54.0827	75.3507
22	88.2663	74.3664	89.2722
23	73.5839	68.3464	78.2078
24	77.4214	100	86.3093
25	73.9264	59.3276	93.4583
26	94.7929	75.6499	95.5629
27	61.7007	74.9696	59.7081
28	71.8323	86.0445	75.6385
29	59.7165	94.2594	77.802
30	100	57.1588	56.2783
31	100	70.7269	75.0495
32	100	57.9535	87.7588
33	80.5485	80.3771	61.9255
34	91.7461	84.9421	59.0137
35	86.8589	87.37	85.2816
36	100	71.017	70.5794
37	100	100	78.4435
38	87.2904	60.918	73.4486
39	24.3014	67.8366	48.7127
40	89.9439	87.1655	59.9148
HOA-PHC
ind #	wild type	rig-6(ok1589)	rig-6(gk438569)			Statistics: Mann-Whitney test
1	27.5194	87.0764	46.3279			Group1	Group2	p-value
2	100	100	25.2023			wild type	rig-6(ok1589)	0.7127	ns
3	82.766	88.9955	61.7844			wild type	rig-6(gk438569)	0.4214	ns
4	84.7127	90.3266	79.0523			rig-6(ok1589)	rig-6(gk438569)	0.6067	ns
5	52.9716	83.9215	84.8915
6	100	75.6567	81.2649
7	84.2101	68.6995	58.1183
8	85.334	100	91.6375
9	77.1226	100	75.4774
10	100	34.7231	86.824
11	29.6525	100	60.4721
12	100	87.9247	96.1429
13	100	61.6605	100
14	91.6474	84.8227	100
15	100	82.0124	100
16	80.4304	60.2097	88.307
17	100	100	93.8495
18	67.6802	82.1709	80.5166
19	83.1184	87.9995	63.3363
20	75.8024	100	83.9807
21	88.0012	60.4757	96.3226
22	100	87.2386	88.964
23	55.0025	89.0924	82.7525
24	79.1961	100	95.8048
25	73.848	78.4377	88.6528
26	98.2212	66.1451	91.8788
27	84.6198	63.8188	52.1236
28	69.7733	92.9114	69.8304
29	100	88.1195	100
30	87.1118	76.1591	89.7451
31	85.8168	54.3325	100
32	86.3311	0	96.3927
33	80.5485	86.9965	63.4451
34	87.0643	72.6947	65.5474
35	85.8096	100	100
36	82.0752	94.6811	91.5238
37	71.4823	100	89.028
38	35.0963	67.3699	100
39	10.4206	82.6006	80.8333
40	45.8461	72.5874	100
