# Supplementary material for: Multiple conserved cell adhesion protein interactions mediate neural wiring of a sensory circuit in C. elegans
Source: eLife. 2017 Sep 13;6:e29257. doi: 10.7554/eLife.29257 (PMC5619950; doi:10.7554/eLife.29257)
Supplement: Figure 3—source data 1. [file elife-29257-fig3-data1.xlsx]

## Sheet: Fig3A
Figure 3A. % axon-axon contact
HOA-AVG
ind #	wild type	casy-1(tm718)	AVGp::casy-1; casy-1(tm718)	HOAp::casy-1; casy-1(tm718)	PHCp::casy-1; casy-1(tm718)			Statistics: Mann-Whitney test
1	56.5838	86.4126	96.4099	22.4572	69.8375			Group1	Group2	p-value
2	100	61.8154	47.5817	79.1574	69.4351			casy-1(tm718)	AVGp::casy-1; casy-1(tm718)	0.0009
3	100	0	83.8484	78.7523	29.6512			casy-1(tm718)	HOAp::casy-1; casy-1(tm718)	0.8804	ns
4	100	0	78.447	73.6407	39.6604			casy-1(tm718)	PHCp::casy-1; casy-1(tm718)	0.3401	ns
5	100	52.6881	97.1046	66.2254	58.276
6	100	11.2768	58.7156	86.618	83.9767
7	88.755	37.3289	74.9188	31.3667	69.2476
8	100	53.3927	75.316	70.1801	38.8223
9	100	75.54	73.1488	23.5135	66.7135
10	71.5386	77.2397	100	39.4557	71.3287
11	80.7571	43.6795	76.9855	84.3923	59.8049
12	100	100	100	90.6116	39.2678
13	100	86.9247	100	88.5197	66.0148
14	100	67.0493	91.1849	68.8654	84.5635
15	100	73.9248	69.1835	83.3216	11.956
16	100	64.209	92.8386	78.0236	63.1609
17	100	54.1616	87.9417	24.0615	79.8436
18	84.8246	38.975	84.6968	58.8695	44.3165
19	85.3574	62.0795	24.033	41.676	54.7683
20	100	79.988	77.1233	79.0475	40.2622
21	89.1874	69.1535	74.8641	69.0759	62.1324
22	100	66.7511	72.7371	68.9049	100
23	100	65.0223	63.9088	53.5977	70.7945
24	97.2551	62.2152	86.2349	0	55.6874
25	98.1199	57.1686	86.4029	35.9806	69.4202
26	98.2212	66.5738	99.0117	81.8235	15.4016
27	100	65.5678	69.5633	28.8894	53.3788
28	49.0087	60.3717	100	87.7839	87.053
29	71.1481	46.9229	92.7835	85.94	30.1537
30	74.1796	64.304	74.9391	39.0718	77.5397
31	94.0144	86.5437
32	100	90.3934
33	92.7772	100
34	64.3289	55.4862
35	86.5248	85.5452
36	83.3206	95.7951
37	69.3131	77.2232
38	53.2859	42.7109
39	75.2575	82.5159
40	59.9158	81.9565
PHC-AVG
ind #	wild type	casy-1(tm718)	AVGp::casy-1; casy-1(tm718)	HOAp::casy-1; casy-1(tm718)	PHCp::casy-1; casy-1(tm718)			Statistics: Mann-Whitney test
1	57.8674	90.6317	100	86.3469	84.4217			Group1	Group2	p-value
2	100	77.1774	81.0258	94.9603	76.221			casy-1(tm718)	AVGp::casy-1; casy-1(tm718)	0.1861	ns
3	100	67.9878	100	86.216	33.1007			casy-1(tm718)	HOAp::casy-1; casy-1(tm718)	0.6016	ns
4	88.9509	100	87.6046	65.8059	37.3456			casy-1(tm718)	PHCp::casy-1; casy-1(tm718)	0.3598	ns
5	60.0691	78.049	100	78.8186	85.4453
6	100	71.7131	94.2145	53.2032	50.9886
7	100	68.0156	91.091	74.1143	96.0826
8	59.0087	72.9215	95.3436	81.4007	79.3803
9	61.7443	94.5585	86.8786	91.9475	91.0867
10	84.5586	93.0772	100	69.5452	68.9944
11	57.4041	53.2333	47.3797	87.0657	84.1788
12	100	88.4091	89.404	62.7256	61.8394
13	81.4342	100	79.7765	95.285	90.9863
14	80.7509	79.6276	87.8053	42.2874	66.6314
15	100	100	80.4813	85.7252	85.7273
16	75.9616	42.0742	78.8603	90.5224	81.7243
17	100	44.6465	79.8686	40.5155	89.8374
18	88.2763	100	82.1148	100	87.998
19	100	89.3059	90.8908	43.2814	85.1884
20	75.8172	83.2885	67.8576	95.2408	71.7768
21	100	90.1885	91.9055	95.4236	35.3144
22	88.2663	47.8288	100	90.1693	100
23	73.5839	83.3051	79.4252	86.8102	55.19
24	77.4214	91.8115	72.891	19.4557	83.8903
25	73.9264	94.632	90.9841	76.0056	82.126
26	94.7929	48.3525	75.0173	55.2344	43.8517
27	61.7007	90.359	100	65.5611	80.6676
28	71.8323	70.8799	84.0764	92.8491	75.0092
29	59.7165	100	63.5157	67.8619	69.8863
30	100	80.2366	67.8975	83.389	100
31	100	82.3937
32	100	66.1921
33	80.5485	88.0845
34	91.7461	89.9289
35	86.8589	62.9776
36	100	88.1795
37	100	73.5387
38	87.2904	51.4714
39	24.3014	17.9268
40	89.9439	93.6583
HOA-PHC
ind #	wild type	casy-1(tm718)	AVGp::casy-1; casy-1(tm718)	HOAp::casy-1; casy-1(tm718)	PHCp::casy-1; casy-1(tm718)			Statistics: Mann-Whitney test
1	27.5194	87.9997	95.5824	90.0321	76.8228			Group1	Group2	p-value
2	100	94.052	49.5738	79.388	43.35			casy-1(tm718)	AVGp::casy-1; casy-1(tm718)	0.0348
3	82.766	0	74.0148	93.1319	74.0641			casy-1(tm718)	HOAp::casy-1; casy-1(tm718)	0.8296	ns
4	84.7127	0	90.9277	12.7196	46.974			casy-1(tm718)	PHCp::casy-1; casy-1(tm718)	0.5491	ns
5	52.9716	39.4789	83.302	74.3611	59.0568
6	100	66.5488	65.7181	17.3073	29.6648
7	84.2101	68.4937	74.0544	90.0915	95.6908
8	85.334	60.0408	78.9957	68.7279	47.9177
9	77.1226	79.0038	89.8563	40.8914	55.1814
10	100	58.7198	100	61.4134	51.8202
11	29.6525	42.4281	72.7091	60.8321	61.6461
12	100	100	93.8504	39.3908	56.6439
13	100	86.9247	59.0645	81.1413	91.7609
14	91.6474	100	78.8445	2.61237	67.6843
15	100	73.9248	72.2338	57.2049	36.7243
16	80.4304	40.2897	92.293	80.2955	100
17	100	5.36558	65.0446	0.785631	84.8217
18	67.6802	32.3563	43.3635	51.1595	41.1107
19	83.1184	77.0483	36.0279	44.0779	100
20	75.8024	75.0404	41.5138	100	41.9376
21	88.0012	40.0207	79.4826	78.2511	43.7063
22	100	23.0299	74.1703	83.3665	100
23	55.0025	65.741	48.6698	48.2452	59.2611
24	79.1961	81.0199	83.8993	6.48998	46.7289
25	73.848	84.903	91.2161	63.7414	58.84
26	98.2212	3.02161	61.6934	35.842	92.6837
27	84.6198	42.491	72.3858	81.1269	74.3935
28	69.7733	49.5457	89.8175	92.5594	62.3717
29	100	67.5955	74.312	81.7084	12.7616
30	87.1118	58.454	67.2684	39.4811	100
31	85.8168	81.3499
32	86.3311	76.1703
33	80.5485	100
34	87.0643	50.9174
35	85.8096	58.7758
36	82.0752	91.3001
37	71.4823	47.4718
38	35.0963	24.0232
39	10.4206	7.09449
40	45.8461	73.0591

## Sheet: Fig3B
Figure 3B. % axon-axon contact
HOA-AVG
ind #	wild type	rig-6(ok1589)	AVGp::rig-6; rig-6(ok1589)	HOAp::rig-6; rig-6(ok1589)	PHCp::rig-6; rig-6(ok1589)			Statistics: Mann-Whitney test
1	56.5838	75.6664	71.0992	58.8319	35.8909			Group1	Group2	p-value
2	100	100	41.103	65.2111	83.3563			rig-6(ok1589)	AVGp::rig-6; rig-6(ok1589)	0.0285
3	100	100	100	77.8813	92.6284			rig-6(ok1589)	HOAp::rig-6; rig-6(ok1589)	0.061	ns
4	100	80.9129	70.7255	85.5532	73.5876			rig-6(ok1589)	PHCp::rig-6; rig-6(ok1589)	0.1184	ns
5	100	87.1296	84.0171	82.0388	93.2713
6	100	88.7362	65.5684	93.0384	100
7	88.755	100	88.8104	100	16.5263
8	100	86.2937	100	58.6752	51.9041
9	100	51.1325	75.59	58.8725	61.7996
10	71.5386	62.5475	100	65.4203	100
11	80.7571	70.9686	92.8374	80.8838	93.2724
12	100	72.2293	86.3319	64.2808	52.2068
13	100	55.9796	69.292	92.1412	100
14	100	79.0412	70.75	68.9415	57.1217
15	100	54.7829	92.2954	90.2628	71.4133
16	100	72.057	100	92.3513	37.63
17	100	88.4317	96.9448	72.0991	79.1566
18	84.8246	80.9677	67.3206	66.4427	70.7913
19	85.3574	100	85.2531	62.1333	76.1528
20	100	58.58	100	68.748	91.7781
21	89.1874	87.8458	91.8452	80.2225	82.4416
22	100	100	51.6984	66.6464	5.53749
23	100	69.5816	90.2593	49.7471	37.4087
24	97.2551	79.1013	95.8345	52.1155	49.11
25	98.1199	80.4666	91.2829	13.1938	28.2403
26	98.2212	67.0823	100	44.8646	85.0399
27	100	58.919	100	73.7028	58.8483
28	49.0087	86.1185	94.6307	77.6919	57.2764
29	71.1481	61.2249	100	16.0439	34.2642
30	74.1796	51.5981	100	24.168	88.2001
31	94.0144	76.7936
32	100	0
33	92.7772	78.5506
34	64.3289	100
35	86.5248	75.0652
36	83.3206	53.9924
37	69.3131	100
38	53.2859	100
39	75.2575	73.8495
40	59.9158	75.4467
PHC-AVG
ind #	wild type	rig-6(ok1589)	AVGp::rig-6; rig-6(ok1589)	HOAp::rig-6; rig-6(ok1589)	PHCp::rig-6; rig-6(ok1589)			Statistics: Mann-Whitney test
1	57.8674	73.3265	80.2357	64.6138	79.073			Group1	Group2	p-value
2	100	100	79.908	86.6464	51.2372			rig-6(ok1589)	AVGp::rig-6; rig-6(ok1589)	0.0216
3	100	86.8056	75.2236	100	84.9568			rig-6(ok1589)	HOAp::rig-6; rig-6(ok1589)	0.4843	ns
4	88.9509	78.7715	87.9699	91.6581	81.8882			rig-6(ok1589)	PHCp::rig-6; rig-6(ok1589)	0.1308	ns
5	60.0691	72.8289	64.5231	84.121	53.6174
6	100	89.769	100	66.505	54.797
7	100	74.5918	65.0036	93.6052	76.0914
8	59.0087	88.7814	84.0857	66.9272	58.8941
9	61.7443	90.732	36.6594	48.5965	70.1542
10	84.5586	42.177	87.8772	100	85.0197
11	57.4041	65.9955	64.7295	91.888	55.3844
12	100	85.2944	90.0328	61.675	56.4873
13	81.4342	53.3318	85.8842	64.8801	67.8229
14	80.7509	72.2858	91.2252	77.4211	56.0827
15	100	53.4992	65.7466	74.7298	50.9425
16	75.9616	74.9988	75.7502	63.3652	75.8947
17	100	70.7028	96.4027	39.7559	63.6544
18	88.2763	68.5327	75.1968	63.2801	82.7382
19	100	77.7544	100	72.9294	93.5401
20	75.8172	59.9139	92.9383	73.2395	69.9028
21	100	54.0827	95.0342	82.3375	74.5482
22	88.2663	74.3664	82.396	100	65.5945
23	73.5839	68.3464	98.0992	48.1568	37.4642
24	77.4214	100	94.1794	72.518	66.8296
25	73.9264	59.3276	97.6706	76.434	61.78
26	94.7929	75.6499	61.3499	68.4384	80.6804
27	61.7007	74.9696	82.5166	73.0653	64.6822
28	71.8323	86.0445	68.4232	69.4707	88.9302
29	59.7165	94.2594	94.8632	31.5858	88.3928
30	100	57.1588	88.1319	50.8073	85.8382
31	100	70.7269
32	100	57.9535
33	80.5485	80.3771
34	91.7461	84.9421
35	86.8589	87.37
36	100	71.017
37	100	100
38	87.2904	60.918
39	24.3014	67.8366
40	89.9439	87.1655
HOA-PHC
ind #	wild type	rig-6(ok1589)	AVGp::rig-6; rig-6(ok1589)	HOAp::rig-6; rig-6(ok1589)	PHCp::rig-6; rig-6(ok1589)			Statistics: Mann-Whitney test
1	27.5194	87.0764	84.0424	62.142	38.6459			Group1	Group2	p-value
2	100	100	100	88.1749	65.2533			rig-6(ok1589)	AVGp::rig-6; rig-6(ok1589)	0.4867	ns
3	82.766	88.9955	27.2195	94.0055	100			rig-6(ok1589)	HOAp::rig-6; rig-6(ok1589)	0.3541	ns
4	84.7127	90.3266	72.0886	68.9226	93.1317			rig-6(ok1589)	PHCp::rig-6; rig-6(ok1589)	0.1928	ns
5	52.9716	83.9215	76.9975	96.43	100
6	100	75.6567	62.6618	63.3993	52.4797
7	84.2101	68.6995	83.0936	68.1991	60.6717
8	85.334	100	92.6439	91.0027	81.8169
9	77.1226	100	100	55.0579	90.4185
10	100	34.7231	77.8578	97.4008	100
11	29.6525	100	60.8339	100	100
12	100	87.9247	81.8533	86.6029	81.9956
13	100	61.6605	100	93.738	90.4814
14	91.6474	84.8227	94.2614	85.7333	54.8798
15	100	82.0124	82.0004	68.3126	68.3126
16	80.4304	60.2097	84.7041	92.3339	87.2777
17	100	100	100	68.1766	56.8009
18	67.6802	82.1709	83.9325	74.9927	74.9927
19	83.1184	87.9995	93.9427	71.5813	71.5813
20	75.8024	100	90.7262	100	100
21	88.0012	60.4757	100	89.8001	89.8001
22	100	87.2386	91.3081	100	100
23	55.0025	89.0924	75.7794	38.5097	24.5238
24	79.1961	100	100	65.1186	40.6506
25	73.848	78.4377	91.2829	30.9745	22.5161
26	98.2212	66.1451	73.5987	54.9888	38.7874
27	84.6198	63.8188	60.9196	78.3076	78.3076
28	69.7733	92.9114	77.2035	47.1321	47.1321
29	100	88.1195	100	92.3518	87.433
30	87.1118	76.1591	100	68.5768	69.4945
31	85.8168	54.3325
32	86.3311	0
33	80.5485	86.9965
34	87.0643	72.6947
35	85.8096	100
36	82.0752	94.6811
37	71.4823	100
38	35.0963	67.3699
39	10.4206	82.6006
40	45.8461	72.5874
