# Supplementary material for: Multiple conserved cell adhesion protein interactions mediate neural wiring of a sensory circuit in C. elegans
Source: eLife. 2017 Sep 13;6:e29257. doi: 10.7554/eLife.29257 (PMC5619950; doi:10.7554/eLife.29257)
Supplement: Figure 4—source data 1. [file elife-29257-fig4-data1.xlsx]

## Sheet: Fig4B
Figure 4B. % axon-axon contact
HOA-AVG
ind #	wild type	casy-1(tm718)	Full-Ct; casy-1(tm718)	Full-Nt; casy-1(tm718)	DNt; casy-1(tm718)	DCads; casy-1(tm718)	DLNS; casy-1(tm718)			Statistics: Mann-Whitney test
1	56.5838	86.4126	100	32.0664	84.3415	92.2986	58.5504			Group1	Group2	p-value
2	100	61.8154	76.2776	78.0046	81.417	31.1251	81.4802			casy-1(tm718)	Full-Ct; casy-1(tm718)	0.0005
3	100	0	49.0565	77.5107	89.1444	79.6612	27.6074			casy-1(tm718)	Full-Nt; casy-1(tm718)	0.0045
4	100	0	71.2649	92.1177	87.2417	100	100			casy-1(tm718)	DNt; casy-1(tm718)	0.6905	ns
5	100	52.6881	91.6536	46.3397	37.1487	59.642	52.3399			casy-1(tm718)	DCads; casy-1(tm718)	0.013
6	100	11.2768	100	100	66.8964	96.3827	64.1605			casy-1(tm718)	DLNS; casy-1(tm718)	0.2728	ns
7	88.755	37.3289	64.7784	79.8914	32.98	66.2254	63.1397
8	100	53.3927	63.3044	100	74.7867	81.9766	59.3646
9	100	75.54	61.1776	78.7142	71.9213	64.6668	100
10	71.5386	77.2397	46.3693	74.613	48.6547	67.0799	23.108
11	80.7571	43.6795	69.4544	81.8305	84.0167	63.5654	66.0475
12	100	100	89.9059	72.9168	65.6176	92.5872	49.6022
13	100	86.9247	66.4021	90.0624	0	60.3785	52.0403
14	100	67.0493	100	81.6763	91.9181	80.7069	61.3729
15	100	73.9248	100	73.6672	41.6082	44.4393	76.1838
16	100	64.209	75.6108	86.8299	0	100	80.0572
17	100	54.1616	74.2418	69.0514	85.6738	96.1306	65.467
18	84.8246	38.975	100	100	67.6741	92.1316	0
19	85.3574	62.0795	88.3974	100	71.2851	39.2293	50.741
20	100	79.988	100	90.7253	0	51.0264	16.7914
21	89.1874	69.1535	94.414	69.433	26.8349	92.3062	69.6786
22	100	66.7511	100	67.4449	82.8575	100	35.6704
23	100	65.0223	89.589	86.5792	77.6988	38.6349	27.2412
24	97.2551	62.2152	93.7622	55.6724	51.1454	79.5125	75.4528
25	98.1199	57.1686	81.6964	10.8751	44.6008	93.786	0
26	98.2212	66.5738	48.047	83.8662	34.1268	81.1718	76.1197
27	100	65.5678	100	83.5135	85.8457	88.4797	88.563
28	49.0087	60.3717	85.1787	57.5046	57.5222	100	76.6777
29	71.1481	46.9229	100	100	77.0486	90.4203	87.9685
30	74.1796	64.304	86.3923	88.4843	53.382	86.4775	0
31	94.0144	86.5437
32	100	90.3934
33	92.7772	100
34	64.3289	55.4862
35	86.5248	85.5452
36	83.3206	95.7951
37	69.3131	77.2232
38	53.2859	42.7109
39	75.2575	82.5159
40	59.9158	81.9565
PHC-AVG
ind #	wild type	casy-1(tm718)	Full-Ct; casy-1(tm718)	Full-Nt; casy-1(tm718)	DNt; casy-1(tm718)	DCads; casy-1(tm718)	DLNS; casy-1(tm718)			Statistics: Mann-Whitney test
1	57.8674	90.6317	100	77.1666	28.1772	81.6296	89.697			Group1	Group2	p-value
2	100	77.1774	96.7955	100	58.4091	70.4472	44.696			casy-1(tm718)	Full-Ct; casy-1(tm718)	0.5748	ns
3	100	67.9878	89.641	47.04	100	75.5201	62.906			casy-1(tm718)	Full-Nt; casy-1(tm718)	0.5584	ns
4	88.9509	100	80.4703	88.0964	79.9428	100	64.9568			casy-1(tm718)	DNt; casy-1(tm718)	0.553	ns
5	60.0691	78.049	100	49.6321	94.446	89.7365	79.1555			casy-1(tm718)	DCads; casy-1(tm718)	0.7455	ns
6	100	71.7131	86.2545	95.5824	77.9547	27.4862	94.4433			casy-1(tm718)	DLNS; casy-1(tm718)	0.3677	ns
7	100	68.0156	100	88.9926	95.643	64.4653	73.0616
8	59.0087	72.9215	69.1999	66.8817	77.6536	69.0014	63.3296
9	61.7443	94.5585	69.5064	70.3472	70.8243	67.6832	30.0796
10	84.5586	93.0772	100	100	77.3667	97.7399	80.1065
11	57.4041	53.2333	58.6456	89.7752	98.192	82.2483	88.9852
12	100	88.4091	70.1667	53.5612	93.2221	83.3688	91.0466
13	81.4342	100	90.2117	88.3129	94.3614	94.3679	70.9706
14	80.7509	79.6276	78.0526	90.5394	85.8267	100	77.6796
15	100	100	91.2219	96.4981	81.3091	38.7788	59.8996
16	75.9616	42.0742	77.5122	91.7839	73.0488	83.5817	76.253
17	100	44.6465	85.6177	97.5091	100	100	81.2072
18	88.2763	100	83.641	93.3496	59.6326	93.4089	81.5501
19	100	89.3059	31.5366	73.3941	91.0135	76.7125	59.3967
20	75.8172	83.2885	58.2026	100	77.645	74.9635	80.5121
21	100	90.1885	74.6393	100	81.531	79.8726	90.9132
22	88.2663	47.8288	50.5488	53.7589	86.3483	86.7018	87.3834
23	73.5839	83.3051	92.1236	85.7039	96.6654	73.0568	87.1405
24	77.4214	91.8115	45.1951	100	66.8055	89.0937	84.982
25	73.9264	94.632	56.901	11.477	83.3584	100	58.2745
26	94.7929	48.3525	52.3427	65.4767	63.9395	86.9585	81.1175
27	61.7007	90.359	83.9742	54.2796	100	80.3941	100
28	71.8323	70.8799	32.6746	85.6684	84.7259	91.0016	93.7861
29	59.7165	100	34.2385	100	50.2363	78.981	50.5145
30	100	80.2366	89.6998	34.7109	96.8391	78.8142	84.8461
31	100	82.3937
32	100	66.1921
33	80.5485	88.0845
34	91.7461	89.9289
35	86.8589	62.9776
36	100	88.1795
37	100	73.5387
38	87.2904	51.4714
39	24.3014	17.9268
40	89.9439	93.6583
HOA-PHC
ind #	wild type	casy-1(tm718)	Full-Ct; casy-1(tm718)	Full-Nt; casy-1(tm718)	DNt; casy-1(tm718)	DCads; casy-1(tm718)	DLNS; casy-1(tm718)			Statistics: Mann-Whitney test
1	27.5194	87.9997	92.1977	77.6779	22.9547	90.4148	72.8589			Group1	Group2	p-value
2	100	94.052	59.5716	100	49.3687	83.1005	5.27342			casy-1(tm718)	Full-Ct; casy-1(tm718)	0.0244
3	82.766	0	84.3736	34.4245	88.7333	73.9713	21.5343			casy-1(tm718)	Full-Nt; casy-1(tm718)	0.0145
4	84.7127	0	33.8255	100	88.2676	100	76.5631			casy-1(tm718)	DNt; casy-1(tm718)	0.7569	ns
5	52.9716	39.4789	100	26.4724	60.4491	92.5118	46.6091			casy-1(tm718)	DCads; casy-1(tm718)	0.0061
6	100	66.5488	91.0651	57.6183	78.1845	0	74.8921			casy-1(tm718)	DLNS; casy-1(tm718)	0.0335
7	84.2101	68.4937	85.5151	74.1356	77.3152	45.1145	19.5372
8	85.334	60.0408	56.6025	48.4993	79.784	60.3764	91.7465
9	77.1226	79.0038	58.2876	67.4113	68.6612	61.6117	9.20481
10	100	58.7198	86.5604	69.4623	26.9747	71.7557	23.2511
11	29.6525	42.4281	80.2687	88.1177	81.5718	35.3187	79.2047
12	100	100	59.8224	58.8824	83.7448	69.6555	61.2779
13	100	86.9247	64.0059	64.3259	0	78.3869	35.4629
14	91.6474	100	93.9306	61.6949	100	100	41.5977
15	100	73.9248	90.0733	100	61.8348	12.2324	34.3751
16	80.4304	40.2897	57.9148	86.0826	0	92.2399	48.3957
17	100	5.36558	91.8932	87.483	59.2198	89.39	28.4866
18	67.6802	32.3563	100	100	70.4592	79.1753	29.7055
19	83.1184	77.0483	91.8496	100	70.8268	77.3692	36.26
20	75.8024	75.0404	63.7074	100	0	69.7292	23.2521
21	88.0012	40.0207	75.6221	97.9622	43.2566	86.7118	62.8783
22	100	23.0299	53.5486	86.5217	85.7046	100	21.4953
23	55.0025	65.741	95.2437	93.2257	76.4394	75.4508	63.7653
24	79.1961	81.0199	36.1754	81.5694	56.1791	74.6891	81.5526
25	73.848	84.903	93.8727	52.6562	80.8476	100	0
26	98.2212	3.02161	93.0606	74.3628	38.5893	100	43.6053
27	84.6198	42.491	88.456	76.1509	85.8457	74.687	65.823
28	69.7733	49.5457	19.3323	36.9224	67.4279	100	68.5903
29	100	67.5955	39.4942	100	31.4448	86.9094	37.1859
30	87.1118	58.454	75.9263	43.8814	53.382	73.9597	27.0321
31	85.8168	81.3499
32	86.3311	76.1703
33	80.5485	100
34	87.0643	50.9174
35	85.8096	58.7758
36	82.0752	91.3001
37	71.4823	47.4718
38	35.0963	24.0232
39	10.4206	7.09449
40	45.8461	73.0591

## Sheet: Fig4D
Figure 4D. % axon-axon contact
HOA-AVG
ind #	wild type	rig-6(ok1589)	Full; rig-6(ok1589)	D1-3Ig; rig-6(ok1589)	D4-6Ig; rig-6(ok1589)	DFN[III]; rig-6(ok1589)			Statistics: Mann-Whitney test
1	56.5838	75.6664	94.0307	58.8847	57.7087	100			Group1	Group2	p-value
2	100	100	100	75.4756	83.2867	97.0026			rig-6(ok1589)	Full; rig-6(ok1589)	0.0288
3	100	100	90.925	68.2142	86.3025	96.2489			rig-6(ok1589)	D1-3Ig; rig-6(ok1589)	0.7363	ns
4	100	80.9129	100	100	75.7835	89.033			rig-6(ok1589)	D4-6Ig; rig-6(ok1589)	0.6154	ns
5	100	87.1296	89.0677	87.3154	81.6446	70.2099			rig-6(ok1589)	DFN[III]; rig-6(ok1589)	0.0248
6	100	88.7362	59.4895	73.2343	83.0765	100
7	88.755	100	86.6804	55.8286	63.3588	97.3054
8	100	86.2937	100	68.7988	73.4254	71.3874
9	100	51.1325	94.0438	65.3551	53.3621	93.4528
10	71.5386	62.5475	88.8455	64.6158	68.4794	34.8479
11	80.7571	70.9686	48.8291	62.5676	100	95.6913
12	100	72.2293	79.0132	88.3268	86.3022	79.2609
13	100	55.9796	100	60.1745	53.7164	95.4995
14	100	79.0412	89.4479	47.5318	74.1534	83.5936
15	100	54.7829	73.962	68.4955	16.6842	100
16	100	72.057	100	100	96.2401	71.9548
17	100	88.4317	76.9742	100	64.2772	61.1892
18	84.8246	80.9677	87.0667	72.8474	67.6069	96.3798
19	85.3574	100	85.4333	96.2096	58.7572	100
20	100	58.58	88.888	70.7292	83.4412	79.3739
21	89.1874	87.8458	63.8052	82.0478	75.3344	97.4627
22	100	100	98.31	90.6022	38.828	82.1189
23	100	69.5816	85.5246	84.1092	62.6014	88.5965
24	97.2551	79.1013	79.3126	65.9016	93.3249	78.7086
25	98.1199	80.4666	68.2723	59.7789	87.6367	81.0424
26	98.2212	67.0823	100	82.292	100	88.3676
27	100	58.919	54.8468	65.2553	100	96.2506
28	49.0087	86.1185	80.6879	96.596	63.3083	89.672
29	71.1481	61.2249	93.5211	86.0005	79.7235	72.0402
30	74.1796	51.5981	91.0594	93.0695	79.1637	81.9761
31	94.0144	76.7936
32	100	0
33	92.7772	78.5506
34	64.3289	100
35	86.5248	75.0652
36	83.3206	53.9924
37	69.3131	100
38	53.2859	100
39	75.2575	73.8495
40	59.9158	75.4467
PHC-AVG
ind #	wild type	rig-6(ok1589)	Full; rig-6(ok1589)	D1-3Ig; rig-6(ok1589)	D4-6Ig; rig-6(ok1589)	DFN[III]; rig-6(ok1589)			Statistics: Mann-Whitney test
1	57.8674	73.3265	100	74.6304	81.6135	90.1986			Group1	Group2	p-value
2	100	100	56.0225	92.3186	74.3912	96.3994			rig-6(ok1589)	Full; rig-6(ok1589)	0.0045
3	100	86.8056	78.8068	74.3823	88.5993	90.0667			rig-6(ok1589)	D1-3Ig; rig-6(ok1589)	0.6928	ns
4	88.9509	78.7715	86.5257	72.3833	78.3834	91.6718			rig-6(ok1589)	D4-6Ig; rig-6(ok1589)	0.4825	ns
5	60.0691	72.8289	68.7374	83.5996	97.875	92.0873			rig-6(ok1589)	DFN[III]; rig-6(ok1589)	0.0028
6	100	89.769	91.651	71.4269	97.1472	95.2378
7	100	74.5918	100	73.167	72.3619	84.2808
8	59.0087	88.7814	80.4557	65.2097	85.1516	70.0543
9	61.7443	90.732	91.1431	69.9063	51.8455	84.6922
10	84.5586	42.177	100	66.5257	70.7118	91.1676
11	57.4041	65.9955	98.1028	84.5751	87.8342	75.0371
12	100	85.2944	91.5256	96.7541	77.5258	53.3434
13	81.4342	53.3318	83.5426	60.9183	82.7783	84.3295
14	80.7509	72.2858	80.1385	54.0444	30.1425	100
15	100	53.4992	76.3518	55.3643	77.8737	89.8924
16	75.9616	74.9988	97.5185	92.0775	69.6714	84.5461
17	100	70.7028	62.5802	85.2663	60.3588	77.3179
18	88.2763	68.5327	90.8502	55.5842	87.6602	86.5049
19	100	77.7544	100	67.9273	56.2556	87.557
20	75.8172	59.9139	100	86.6882	85.8648	100
21	100	54.0827	60.7057	79.1672	85.0801	56.7167
22	88.2663	74.3664	85.5252	89.6302	91.3079	79.5142
23	73.5839	68.3464	69.399	78.639	62.0168	96.1799
24	77.4214	100	87.6185	59.8412	73.1533	93.9537
25	73.9264	59.3276	89.1674	86.937	54.4946	70.2011
26	94.7929	75.6499	80.5014	90.0965	55.4897	80.0032
27	61.7007	74.9696	82.9014	56.0289	78.3273	89.568
28	71.8323	86.0445	91.7369	82.295	91.5481	83.7114
29	59.7165	94.2594	62.5681	87.6999	96.0406	88.302
30	100	57.1588	77.1199	93.5383	85.0469	72.0672
31	100	70.7269
32	100	57.9535
33	80.5485	80.3771
34	91.7461	84.9421
35	86.8589	87.37
36	100	71.017
37	100	100
38	87.2904	60.918
39	24.3014	67.8366
40	89.9439	87.1655
HOA-PHC
ind #	wild type	rig-6(ok1589)	Full; rig-6(ok1589)	D1-3Ig; rig-6(ok1589)	D4-6Ig; rig-6(ok1589)	DFN[III]; rig-6(ok1589)			Statistics: Mann-Whitney test
1	27.5194	87.0764	88.4705	76.3046	79.3586	95.751			Group1	Group2	p-value
2	100	100	52.6699	100	100	92.53			rig-6(ok1589)	Full; rig-6(ok1589)	0.9882	ns
3	82.766	88.9955	91.2918	89.5134	85.9351	90.1214			rig-6(ok1589)	D1-3Ig; rig-6(ok1589)	0.5588	ns
4	84.7127	90.3266	100	59.2005	100	89.033			rig-6(ok1589)	D4-6Ig; rig-6(ok1589)	0.3214	ns
5	52.9716	83.9215	70.5824	95.6118	97.1467	88.4072			rig-6(ok1589)	DFN[III]; rig-6(ok1589)	0.6599	ns
6	100	75.6567	69.9612	77.8542	93.4808	95.7283
7	84.2101	68.6995	95.8089	37.1941	94.0872	69.8175
8	85.334	100	83.9958	46.1874	68.5897	94.3443
9	77.1226	100	96.1905	100	71.0929	77.6916
10	100	34.7231	100	48.0219	100	75.9524
11	29.6525	100	69.9172	63.0278	100	86.3559
12	100	87.9247	84.147	100	75.2233	45.4485
13	100	61.6605	81.0879	73.3163	58.9938	68.9737
14	91.6474	84.8227	100	100	48.0978	82.7865
15	100	82.0124	54.1023	88.5852	38.2282	90.0516
16	80.4304	60.2097	100	100	70.9839	88.3983
17	100	100	56.5335	100	38.4001	65.1376
18	67.6802	82.1709	47.778	37.29	100	85.8792
19	83.1184	87.9995	80.2413	92.491	100	80.4537
20	75.8024	100	100	89.0028	97.7507	74.2257
21	88.0012	60.4757	96.833	96.1435	73.431	23.4676
22	100	87.2386	94.4527	100	61.7336	48.5149
23	55.0025	89.0924	72.3176	73.8479	35.1808	90.0101
24	79.1961	100	63.7409	43.1784	68.2656	82.2933
25	73.848	78.4377	74.612	59.5862	67.245	100
26	98.2212	66.1451	96.0901	55.9693	56.7922	92.0431
27	84.6198	63.8188	92.0829	37.8865	73.1948	80.1187
28	69.7733	92.9114	94.4935	86.9123	59.24	59.7751
29	100	88.1195	79.4354	87.0633	88.5178	87.75
30	87.1118	76.1591	63.1443	70.7829	78.6592	73.7745
31	85.8168	54.3325
32	86.3311	0
33	80.5485	86.9965
34	87.0643	72.6947
35	85.8096	100
36	82.0752	94.6811
37	71.4823	100
38	35.0963	67.3699
39	10.4206	82.6006
40	45.8461	72.5874
