# Supplementary material for: Multiple conserved cell adhesion protein interactions mediate neural wiring of a sensory circuit in C. elegans
Source: eLife. 2017 Sep 13;6:e29257. doi: 10.7554/eLife.29257 (PMC5619950; doi:10.7554/eLife.29257)
Supplement: Figure 5—source data 1. [file elife-29257-fig5-data1.xlsx]

## Sheet: Fig5B
Figure 5B. Number of RAB-3 puncta
ind #	wild type	bam-2(cy6)			Statistics: Mann-Whitney test
1	9	7			Group1	Group2	p-value
2	15	13			wild type	bam-2(cy6)	0.0061
3	11	13
4	15	13
5	17	13
6	14	11
7	15	12
8	14	11
9	12	12
10	13	11
11	12	9
12	11	10
13	11	10
14	11	9
15	11	10
16	9	11
17	15	15
18	17	14
19	10	12
20	13	9
21	13	11
22	12	9
23	14	7
24	16	12
25	12	9
26	13	11
27	15	12
28	10	12
29	14	12
30	11	14

## Sheet: Fig5D
Figure 5D. % axon-axon contact
HOA-AVG
ind #	wild type	casy-1(tm718)	bam-2(cy6)	casy-1;bam-2			Statistics: Mann-Whitney test
1	56.5838	86.4126	86.0025	38.4226			Group1	Group2	p-value
2	100	61.8154	36.5903	81.196			wild type	casy-1(tm718)	<0.0001
3	100	0	44.9169	37.7509			wild type	bam-2(cy6)	<0.0001
4	100	0	56.1256	84.5013			casy-1;bam-2	casy-1(tm718)	0.1992	ns
5	100	52.6881	81.4451	76.178			casy-1;bam-2	bam-2(cy6)	0.0966	ns
6	100	11.2768	100	60.9956
7	88.755	37.3289	32.5044	88.7995
8	100	53.3927	71.1445	0
9	100	75.54	59.5127	93.1189
10	71.5386	77.2397	67.875	46.6358
11	80.7571	43.6795	70.2869	66.9475
12	100	100	27.9818	71.3587
13	100	86.9247	70.3277	62.3024
14	100	67.0493	96.6006	35.8511
15	100	73.9248	62.4514	80.9705
16	100	64.209	38.7782	87.6006
17	100	54.1616	82.8916	59.9446
18	84.8246	38.975	83.3369	59.4932
19	85.3574	62.0795	91.3739	11.7521
20	100	79.988	18.0055	85.3532
21	89.1874	69.1535	68.0477	81.233
22	100	66.7511	42.8357	22.4944
23	100	65.0223	67.6912	60.0778
24	97.2551	62.2152	70.2401	30.3761
25	98.1199	57.1686	54.682	57.0915
26	98.2212	66.5738	59.2554	70.1299
27	100	65.5678	100	27.6641
28	49.0087	60.3717	88.7738	70.7384
29	71.1481	46.9229	0	47.3565
30	74.1796	64.304	0	0
31	94.0144	86.5437	58.3712	57.5605
32	100	90.3934	89.2448	100
33	92.7772	100	78.1013	65.1987
34	64.3289	55.4862	65.4571	55.774
35	86.5248	85.5452	82.5754	50.4348
36	83.3206	95.7951	74.6312	53.1429
37	69.3131	77.2232	86.0285	58.8132
38	53.2859	42.7109	80.1699	53.8663
39	75.2575	82.5159	94.0821	28.4616
40	59.9158	81.9565	66.196	77.5953
PHC-AVG
ind #	wild type	casy-1(tm718)	bam-2(cy6)	casy-1;bam-2			Statistics: Mann-Whitney test
1	57.8674	90.6317	93.5466	58.0623			Group1	Group2	p-value
2	100	77.1774	60.2346	69.3076			wild type	casy-1(tm718)	0.1428	ns
3	100	67.9878	60.1855	90.1933			wild type	bam-2(cy6)	0.2783	ns
4	88.9509	100	91.3749	71.5765			casy-1;bam-2	casy-1(tm718)	0.8294	ns
5	60.0691	78.049	100	100			casy-1;bam-2	bam-2(cy6)	0.452	ns
6	100	71.7131	87.6441	100
7	100	68.0156	91.3477	93.7856
8	59.0087	72.9215	80.677	87.9545
9	61.7443	94.5585	93.9542	92.022
10	84.5586	93.0772	73.6516	96.5247
11	57.4041	53.2333	83.8732	81.0412
12	100	88.4091	100	74.243
13	81.4342	100	93.2638	84.1253
14	80.7509	79.6276	66.2146	72.2819
15	100	100	94.0071	70.7692
16	75.9616	42.0742	83.8126	48.2649
17	100	44.6465	81.5724	83.6278
18	88.2763	100	81.1601	80.3355
19	100	89.3059	92.2787	81.1694
20	75.8172	83.2885	63.384	95.6223
21	100	90.1885	76.7755	57.8284
22	88.2663	47.8288	96.4868	82.2168
23	73.5839	83.3051	72.1142	65.7681
24	77.4214	91.8115	60.102	42.182
25	73.9264	94.632	76.6353	62.055
26	94.7929	48.3525	52.1158	78.5898
27	61.7007	90.359	21.7449	66.4532
28	71.8323	70.8799	66.4692	86.86
29	59.7165	100	93.4543	78.2777
30	100	80.2366	98.1831	51.5466
31	100	82.3937	57.5653	81.6415
32	100	66.1921	88.565	72.6358
33	80.5485	88.0845	80.0139	64.6032
34	91.7461	89.9289	85.0474	53.2318
35	86.8589	62.9776	80.3056	93.2399
36	100	88.1795	76.2049	100
37	100	73.5387	90.9581	96.2652
38	87.2904	51.4714	100	70.5415
39	24.3014	17.9268	80.8214	92.7283
40	89.9439	93.6583	93.1851	100
HOA-PHC
ind #	wild type	casy-1(tm718)	bam-2(cy6)	casy-1;bam-2			Statistics: Mann-Whitney test
1	27.5194	87.9997	73.8288	47.2189			Group1	Group2	p-value
2	100	94.052	90.1536	64.0647			wild type	casy-1(tm718)	0.0004
3	82.766	0	96.9062	49.4106			wild type	bam-2(cy6)	0.0063
4	84.7127	0	69.1125	96.0569			casy-1;bam-2	casy-1(tm718)	0.8389	ns
5	52.9716	39.4789	86.4167	78.5402			casy-1;bam-2	bam-2(cy6)	0.0995	ns
6	100	66.5488	84.0665	65.4327
7	84.2101	68.4937	57.9254	77.8299
8	85.334	60.0408	41.7446	12.3517
9	77.1226	79.0038	79.7894	92.653
10	100	58.7198	46.5709	87.1247
11	29.6525	42.4281	90.6798	35.4279
12	100	100	43.3024	73.0381
13	100	86.9247	76.053	56.5298
14	91.6474	100	94.7427	23.7257
15	100	73.9248	70.6108	47.5069
16	80.4304	40.2897	100	19.1263
17	100	5.36558	47.8088	71.4006
18	67.6802	32.3563	67.898	42.9328
19	83.1184	77.0483	100	16.2808
20	75.8024	75.0404	66.5853	100
21	88.0012	40.0207	61.2326	56.2839
22	100	23.0299	69.9151	39.946
23	55.0025	65.741	83.7077	91.5449
24	79.1961	81.0199	52.2784	7.584
25	73.848	84.903	45.2093	41.1305
26	98.2212	3.02161	100	66.8276
27	84.6198	42.491	13.3658	36.8235
28	69.7733	49.5457	56.3345	85.6364
29	100	67.5955	0	57.8351
30	87.1118	58.454	0	93.3053
31	85.8168	81.3499	45.2504	79.1592
32	86.3311	76.1703	83.4576	81.8783
33	80.5485	100	65.3491	72.8154
34	87.0643	50.9174	77.0613	9.71431
35	85.8096	58.7758	75.2885	54.8918
36	82.0752	91.3001	62.5091	53.3154
37	71.4823	47.4718	80.351	55.1927
38	35.0963	24.0232	63.6089	55.6467
39	10.4206	7.09449	79.797	33.6945
40	45.8461	73.0591	70.8714	85.2037

## Sheet: Fig5E
Figure 5E. % axon-axon contact
HOA-AVG
ind #	wild type	bam-2(cy6)	HOAp::bam-2; bam-2(cy6)	PHCp::bam-2; bam-2(cy6)			Statistics: Mann-Whitney test
1	56.5838	86.0025	82.653	46.2183			Group1	Group2	p-value
2	100	36.5903	93.1283	39.3466			bam-2(cy6)	HOAp::bam-2; bam-2(cy6)	0.0003
3	100	44.9169	93.4391	73.1817			bam-2(cy6)	PHCp::bam-2; bam-2(cy6)	0.5732	ns
4	100	56.1256	65.8447	66.1232
5	100	81.4451	94.3481	91.8638
6	100	100	70.0522	90.9292
7	88.755	32.5044	91.4699	66.6948
8	100	71.1445	56.9958	64.3354
9	100	59.5127	87.28	91.6666
10	71.5386	67.875	79.8323	79.5765
11	80.7571	70.2869	91.4458	59.7892
12	100	27.9818	80.9374	84.3429
13	100	70.3277	5.57528	82.0531
14	100	96.6006	84.1307	80.563
15	100	62.4514	83.1434	97.7687
16	100	38.7782	90.4299	0
17	100	82.8916	91.5976	51.3802
18	84.8246	83.3369	75.8926	78.7361
19	85.3574	91.3739	79.9267	77.0267
20	100	18.0055	88.5408	89.1313
21	89.1874	68.0477	85.7147	10.1149
22	100	42.8357	85.3581	63.6749
23	100	67.6912	87.8527	76.9984
24	97.2551	70.2401	80.0024	79.6154
25	98.1199	54.682	100	60.929
26	98.2212	59.2554	82.9334	80.4649
27	100	100	91.4508	85.0503
28	49.0087	88.7738	100	80.1607
29	71.1481	0	86.8838	65.9209
30	74.1796	0	100	58.998
31	94.0144	58.3712
32	100	89.2448
33	92.7772	78.1013
34	64.3289	65.4571
35	86.5248	82.5754
36	83.3206	74.6312
37	69.3131	86.0285
38	53.2859	80.1699
39	75.2575	94.0821
40	59.9158	66.196
PHC-AVG
ind #	wild type	bam-2(cy6)	HOAp::bam-2; bam-2(cy6)	PHCp::bam-2; bam-2(cy6)			Statistics: Mann-Whitney test
1	57.8674	93.5466	91.9955	88.2981			Group1	Group2	p-value
2	100	60.2346	96.953	87.8439			bam-2(cy6)	HOAp::bam-2; bam-2(cy6)	0.5374	ns
3	100	60.1855	67.6766	100			bam-2(cy6)	PHCp::bam-2; bam-2(cy6)	0.73	ns
4	88.9509	91.3749	67.6108	71.4942
5	60.0691	100	82.7167	61.1678
6	100	87.6441	77.3174	85.804
7	100	91.3477	90.8559	96.8705
8	59.0087	80.677	91.1733	63.8951
9	61.7443	93.9542	69.5661	93.6113
10	84.5586	73.6516	79.1575	70.7004
11	57.4041	83.8732	80.1505	97.9307
12	100	100	85.4955	97.1063
13	81.4342	93.2638	37.49	80.5244
14	80.7509	66.2146	91.6953	51.6125
15	100	94.0071	89.3885	100
16	75.9616	83.8126	66.8704	100
17	100	81.5724	88.0181	51.6307
18	88.2763	81.1601	84.5594	100
19	100	92.2787	86.2815	100
20	75.8172	63.384	72.0112	73.1539
21	100	76.7755	86.0964	74.3781
22	88.2663	96.4868	92.6333	70.0598
23	73.5839	72.1142	61.6728	78.2571
24	77.4214	60.102	84.213	46.6031
25	73.9264	76.6353	100	96.2829
26	94.7929	52.1158	94.5039	93.4987
27	61.7007	21.7449	93.089	94.7944
28	71.8323	66.4692	100	75.0463
29	59.7165	93.4543	87.9207	71.9361
30	100	98.1831	100	67.4168
31	100	57.5653
32	100	88.565
33	80.5485	80.0139
34	91.7461	85.0474
35	86.8589	80.3056
36	100	76.2049
37	100	90.9581
38	87.2904	100
39	24.3014	80.8214
40	89.9439	93.1851
HOA-PHC
ind #	wild type	bam-2(cy6)	HOAp::bam-2; bam-2(cy6)	PHCp::bam-2; bam-2(cy6)			Statistics: Mann-Whitney test
1	27.5194	73.8288	87.6152	90.0508			Group1	Group2	p-value
2	100	90.1536	94.889	89.4875			bam-2(cy6)	HOAp::bam-2; bam-2(cy6)	0.0009
3	82.766	96.9062	75.1726	87.8114			bam-2(cy6)	PHCp::bam-2; bam-2(cy6)	0.3296	ns
4	84.7127	69.1125	31.637	43.9126
5	52.9716	86.4167	74.7157	38.6249
6	100	84.0665	63.8267	84.4635
7	84.2101	57.9254	92.9159	80.7009
8	85.334	41.7446	88.6436	69.7656
9	77.1226	79.7894	73.6784	90.5003
10	100	46.5709	42.1851	71.8761
11	29.6525	90.6798	76.8771	76.8026
12	100	43.3024	84.5702	78.6951
13	100	76.053	88.701	83.8027
14	91.6474	94.7427	97.0016	24.9008
15	100	70.6108	83.8906	100
16	80.4304	100	71.3155	0
17	100	47.8088	80.1377	71.4348
18	67.6802	67.898	100	100
19	83.1184	100	79.5607	83.2268
20	75.8024	66.5853	84.8371	74.1794
21	88.0012	61.2326	71.5946	64.4486
22	100	69.9151	100	81.567
23	55.0025	83.7077	87.2517	67.1956
24	79.1961	52.2784	96.8496	31.9241
25	73.848	45.2093	93.3868	63.9403
26	98.2212	100	85.7608	78.37
27	84.6198	13.3658	86.2305	84.4141
28	69.7733	56.3345	100	57.7559
29	100	0	100	75.379
30	87.1118	0	100	84.0571
31	85.8168	45.2504
32	86.3311	83.4576
33	80.5485	65.3491
34	87.0643	77.0613
35	85.8096	75.2885
36	82.0752	62.5091
37	71.4823	80.351
38	35.0963	63.6089
39	10.4206	79.797
40	45.8461	70.8714

## Sheet: Fig5-supple1B
Figure 5-figure supplement 1B. Number of RAB-3 puncta
ind #	wild type	igcm-1(ok711)	nlg-1(ok259)	oig-8(gk867223)	oig-1(ok1687)	lat-1(ok1465)	ncam-1(hd49)	wrk-1(ok695)	zig-1(ok784)			Statistics: Mann-Whitney test
1	9	12	13	11	11	12	13	12	10			Group1	Group2	p-value
2	15	10	13	11	11	16	12	16	11			wild type	igcm-1(ok711)	0.5205	ns
3	11	14	8	12	10	13	7	11	10			wild type	nlg-1(ok259)	0.6973	ns
4	15	10	13	9	10	14	12	14	10			wild type	oig-8(gk867223)	<0.0001
5	17	9	11	14	13	9	10	17	15			wild type	oig-1(ok1687)	0.0004
6	14	9	12	10	13	12	12	15	11			wild type	lat-1(ok1465)	0.0694	ns
7	15	13	13	12	17	13	13	15	11			wild type	ncam-1(hd49)	0.1473	ns
8	14	12	14	8	18	12	11	9	8			wild type	wrk-1(ok695)	0.4698	ns
9	12	11	12	7	10	19	12	16	12			wild type	zig-1(ok784)	0.2157	ns
10	13	13	15	14	10	10	10	12	13
11	12	13	7	6	13	12	15	17	14
12	11	12	9	11	9	12	10	12	10
13	11	13	9	8	12	6	16	10	17
14	11	14	14	8	12	10	14	14	14
15	11	14	11	11	14	12	12	14	9
16	9	10	9	10	10	13	12	11	11
17	15	13	16	12	8	12	12	15	13
18	17	15	15	12	8	10	13	11	8
19	10	13	17	5	9	14	12	15	18
20	13	14	13	8	4	12	11	13	9
21	13	11	13	10	10	12	9	10	15
22	12	12	12	7	8	10	12	17	14
23	14	13	15	9	6	12	12	12	11
24	16	12	9	11	6	11	9	14	13
25	12	14	10	11	11	13	13	14	13
26	13	13	15	7	9	11	14	14	11
27	15	12	15	11	7	9	12	13	12
28	10	19	11	10	10	12	13	10	16
29	14	14	14	12	11	11	12	13	11
30	11	11	15	12	13	8	12	12	14

## Sheet: Fig5-supple2B
Figure 5-figure supplement 2B. Number of RAB-3 puncta
ind #	wild type	nrx-1(ok1649)	nrx-1(wy778)			Statistics: Mann-Whitney test
1	9	13	14			Group1	Group2	p-value
2	15	15	12			wild type	nrx-1(ok1649)	0.5119	ns
3	11	17	7			wild type	nrx-1(wy778)	0.232	ns
4	15	14	12
5	17	12	8
6	14	13	10
7	15	16	13
8	14	10	11
9	12	13	11
10	13	11	11
11	12	12	12
12	11	14	15
13	11	12	14
14	11	12	7
15	11	12	15
16	9	12	11
17	15	9	10
18	17	9	12
19	10	11	13
20	13	16	17
21	13	13	12
22	12	10	11
23	14	14	12
24	16	10	15
25	12	14	15
26	13	11	11
27	15	9	13
28	10	13	11
29	14	13	15
30	11	13	10
