# Supplementary material for: Multiple conserved cell adhesion protein interactions mediate neural wiring of a sensory circuit in C. elegans
Source: eLife. 2017 Sep 13;6:e29257. doi: 10.7554/eLife.29257 (PMC5619950; doi:10.7554/eLife.29257)
Supplement: Figure 6—source data 1. [file elife-29257-fig6-data1.xlsx]

## Sheet: Fig6B
Figure 6B. Number of RAB-3 puncta
ind #	wild type	sax-7(nj48)			Statistics: Mann-Whitney test
1	9	10			Group1	Group2	p-value
2	15	10			wild type	sax-7(nj48)	<0.0001
3	11	12
4	15	7
5	17	9
6	14	12
7	15	13
8	14	11
9	12	11
10	13	13
11	12	8
12	11	9
13	11	12
14	11	9
15	11	11
16	9	9
17	15	9
18	17	11
19	10	12
20	13	11
21	13	11
22	12	10
23	14	11
24	16	11
25	12	10
26	13	10
27	15	11
28	10	10
29	14	12
30	11	8

## Sheet: Fig6D
Figure 6D. % axon-axon contact
HOA-AVG
ind #	wild type	rig-6(ok1589)	sax-7(nj48)	rig-6;sax-7			Statistics: Mann-Whitney test
1	56.5838	75.6664	100	100			Group1	Group2	p-value
2	100	100	100	93.3742			wild type	rig-6(ok1589)	0.003
3	100	100	62.3163	53.0642			wild type	sax-7(nj48)	0.0067
4	100	80.9129	100	100			rig-6;sax-7	rig-6(ok1589)	0.4674	ns
5	100	87.1296	89.9187	42.857			rig-6;sax-7	sax-7(nj48)	0.4905	ns
6	100	88.7362	83.4037	86.8458
7	88.755	100	32.8815	73.9349
8	100	86.2937	68.5662	79.341
9	100	51.1325	65.1189	100
10	71.5386	62.5475	74.8736	24.1946
11	80.7571	70.9686	62.9696	100
12	100	72.2293	58.072	100
13	100	55.9796	68.6075	65.6787
14	100	79.0412	91.3859	54.0462
15	100	54.7829	22.0257	96.4613
16	100	72.057	83.7633	66.0768
17	100	88.4317	53.4857	29.6414
18	84.8246	80.9677	80.616	100
19	85.3574	100	100	84.3196
20	100	58.58	70.468	51.0536
21	89.1874	87.8458	75.1545	22.0687
22	100	100	100	75.4992
23	100	69.5816	100	17.3746
24	97.2551	79.1013	100	55.1006
25	98.1199	80.4666	78.4066	50.8221
26	98.2212	67.0823	69.8385	76.4532
27	100	58.919	69.419	62.3623
28	49.0087	86.1185	89.8059	54.3026
29	71.1481	61.2249	93.0382	76.1186
30	74.1796	51.5981	79.0512	32.3703
31	94.0144	76.7936	100	62.7434
32	100	0	84.3167	91.3131
33	92.7772	78.5506	57.8955	100
34	64.3289	100	0	85.4667
35	86.5248	75.0652	100	61.9398
36	83.3206	53.9924	55.0939	100
37	69.3131	100	100	76.0742
38	53.2859	100	55.1818	100
39	75.2575	73.8495	79.553	58.4586
40	59.9158	75.4467	42.1937	95.2573
PHC-AVG
ind #	wild type	rig-6(ok1589)	sax-7(nj48)	rig-6;sax-7			Statistics: Mann-Whitney test
1	57.8674	73.3265	90.257	53.3438			Group1	Group2	p-value
2	100	100	59.2664	100			wild type	rig-6(ok1589)	0.0043
3	100	86.8056	59.7152	25.3406			wild type	sax-7(nj48)	0.003
4	88.9509	78.7715	76.7474	87.5743			rig-6;sax-7	rig-6(ok1589)	0.1932	ns
5	60.0691	72.8289	89.4298	47.0899			rig-6;sax-7	sax-7(nj48)	0.7106	ns
6	100	89.769	72.2035	67.3748
7	100	74.5918	35.5627	90.1822
8	59.0087	88.7814	8.51149	61.9552
9	61.7443	90.732	67.9745	82.3662
10	84.5586	42.177	41.6832	58.8838
11	57.4041	65.9955	59.2219	66.6645
12	100	85.2944	51.6034	64.1654
13	81.4342	53.3318	100	69.7576
14	80.7509	72.2858	73.112	100
15	100	53.4992	53.9866	67.4125
16	75.9616	74.9988	28.0108	89.0091
17	100	70.7028	35.0865	71.728
18	88.2763	68.5327	95.0715	63.8428
19	100	77.7544	100	73.4156
20	75.8172	59.9139	100	94.336
21	100	54.0827	86.4106	57.8632
22	88.2663	74.3664	100	100
23	73.5839	68.3464	88.4165	23.6876
24	77.4214	100	69.6596	73.7651
25	73.9264	59.3276	60.4821	100
26	94.7929	75.6499	84.5269	78.712
27	61.7007	74.9696	79.8047	63.0032
28	71.8323	86.0445	89.084	44.4433
29	59.7165	94.2594	72.6851	63.4652
30	100	57.1588	90.4355	42.6228
31	100	70.7269	92.6063	42.8661
32	100	57.9535	64.9591	81.254
33	80.5485	80.3771	75.2682	91.4358
34	91.7461	84.9421	40.2912	27.7463
35	86.8589	87.37	90.5609	48.8786
36	100	71.017	70.0016	86.0012
37	100	100	56.1158	83.1538
38	87.2904	60.918	47.0118	91.8743
39	24.3014	67.8366	76.7582	36.3015
40	89.9439	87.1655	43.0961	56.869
HOA-PHC
ind #	wild type	rig-6(ok1589)	sax-7(nj48)	rig-6;sax-7			Statistics: Mann-Whitney test
1	27.5194	87.0764	100	39.9297			Group1	Group2	p-value
2	100	100	66.6603	100			wild type	rig-6(ok1589)	0.7127	ns
3	82.766	88.9955	100	66.8565			wild type	sax-7(nj48)	0.8287	ns
4	84.7127	90.3266	80.7941	100			rig-6;sax-7	rig-6(ok1589)	0.3817	ns
5	52.9716	83.9215	100	66.5994			rig-6;sax-7	sax-7(nj48)	0.5605	ns
6	100	75.6567	100	76.868
7	84.2101	68.6995	81.2539	94.5842
8	85.334	100	73.2064	70.2441
9	77.1226	100	94.3418	95.0661
10	100	34.7231	52.7557	0
11	29.6525	100	87.2427	60.7874
12	100	87.9247	77.3821	59.3555
13	100	61.6605	84.1284	95.6827
14	91.6474	84.8227	90.5233	100
15	100	82.0124	34.9335	100
16	80.4304	60.2097	71.0599	62.3705
17	100	100	58.251	30.4157
18	67.6802	82.1709	90.5324	64.9538
19	83.1184	87.9995	66.9747	73.2514
20	75.8024	100	70.468	69.857
21	88.0012	60.4757	100	28.0207
22	100	87.2386	100	100
23	55.0025	89.0924	76.3084	100
24	79.1961	100	87.9	83.9954
25	73.848	78.4377	71.8736	80.135
26	98.2212	66.1451	91.3796	77.8554
27	84.6198	63.8188	84.1048	100
28	69.7733	92.9114	70.1443	59.331
29	100	88.1195	84.5451	38.7428
30	87.1118	76.1591	88.4276	80.61
31	85.8168	54.3325	100	67.6971
32	86.3311	0	93.7012	84.224
33	80.5485	86.9965	76.9895	92.8598
34	87.0643	72.6947	79.8669	52.8982
35	85.8096	100	100	51.2308
36	82.0752	94.6811	86.0758	91.5028
37	71.4823	100	61.6942	88.2252
38	35.0963	67.3699	26.4008	100
39	10.4206	82.6006	67.3643	100
40	45.8461	72.5874	35.3249	88.344

## Sheet: Fig6E
Figure 6E. % axon-axon contact
HOA-AVG
ind #	wild type	sax-7(nj48)	HOAp::sax-7s; sax-7(nj48)	HOAp::sax-7l; sax-7(nj48)	PHCp::sax-7s; sax-7(nj48)	PHCp::sax-7l; sax-7(nj48)			Statistics: Mann-Whitney test
1	56.5838	100	78.7516	62.6887	100	76.6488			Group1	Group2	p-value
2	100	100	59.1401	45.434	85.3691	67.5885			sax-7(nj48)	HOAp::sax-7s; sax-7(nj48)	0.9504	ns
3	100	62.3163	100	91.8571	68.2982	100			sax-7(nj48)	HOAp::sax-7l; sax-7(nj48)	0.383	ns
4	100	100	100	80.6446	54.0154	17.6658			sax-7(nj48)	PHCp::sax-7s; sax-7(nj48)	0.0342
5	100	89.9187	0	49.5383	80.1303	94.4427			sax-7(nj48)	PHCp::sax-7l; sax-7(nj48)	0.9292	ns
6	100	83.4037	85.0003	72.0958	17.2385	73.4918
7	88.755	32.8815	25.7283	85.3139	90.6497	86.4398
8	100	68.5662	100	100	100	80.5787
9	100	65.1189	100	84.6767	81.8284	82.0888
10	71.5386	74.8736	100	100	100	95.5871
11	80.7571	62.9696	79.9979	94.8237	100	59.7452
12	100	58.072	85.5043	100	100	100
13	100	68.6075	77.2252	100	92.9479	68.4461
14	100	91.3859	86.9637	68.5623	100	100
15	100	22.0257	100	79.6865	100	100
16	100	83.7633	80.4697	0	92.6173	65.3418
17	100	53.4857	69.2823	100	100	11.1946
18	84.8246	80.616	39.0561	54.6163	75.7891	72.5095
19	85.3574	100	51.566	81.0197	100	25.3011
20	100	70.468	100	60.9706	100	73.4136
21	89.1874	75.1545	57.6916	76.7694	90.1989	63.2913
22	100	100	89.903	68.3445	64.2223	94.7456
23	100	100	32.5912	56.836	47.4716	90.5678
24	97.2551	100	40.9093	17.1637	81.671	100
25	98.1199	78.4066	84.9264	69.8512	91.3002	56.7252
26	98.2212	69.8385	42.3263	0	85.8871	86.666
27	100	69.419	85.2969	60.8373	93.8108	89.1233
28	49.0087	89.8059	89.4012	5.41365	73.1641	66.6057
29	71.1481	93.0382	60.6793	79.7693	100	73.4366
30	74.1796	79.0512	86.6293	81.8371	96.626	87.1823
31	94.0144	100
32	100	84.3167
33	92.7772	57.8955
34	64.3289	0
35	86.5248	100
36	83.3206	55.0939
37	69.3131	100
38	53.2859	55.1818
39	75.2575	79.553
40	59.9158	42.1937
PHC-AVG
ind #	wild type	sax-7(nj48)	HOAp::sax-7s; sax-7(nj48)	HOAp::sax-7l; sax-7(nj48)	PHCp::sax-7s; sax-7(nj48)	PHCp::sax-7l; sax-7(nj48)			Statistics: Mann-Whitney test
1	57.8674	90.257	80.5167	66.0345	93.1591	26.9425			Group1	Group2	p-value
2	100	59.2664	31.4885	64.0298	57.6666	73.2123			sax-7(nj48)	HOAp::sax-7s; sax-7(nj48)	0.9014	ns
3	100	59.7152	87.4542	73.8739	54.3602	89.6143			sax-7(nj48)	HOAp::sax-7l; sax-7(nj48)	0.2287	ns
4	88.9509	76.7474	47.3669	23.4311	90.2229	27.4426			sax-7(nj48)	PHCp::sax-7s; sax-7(nj48)	0.0164
5	60.0691	89.4298	83.3369	49.7702	100	33.2033			sax-7(nj48)	PHCp::sax-7l; sax-7(nj48)	0.3837	ns
6	100	72.2035	90.6255	63.0889	37.3983	100
7	100	35.5627	100	82.751	100	90.3154
8	59.0087	8.51149	100	41.6627	73.5206	73.9444
9	61.7443	67.9745	97.3591	87.1201	90.8692	41.497
10	84.5586	41.6832	100	62.0406	73.6797	79.678
11	57.4041	59.2219	71.9142	29.1579	91.7472	19.4708
12	100	51.6034	89.1004	44.9782	91.2998	49.8854
13	81.4342	100	94.4276	81.7156	75.2109	100
14	80.7509	73.112	76.4899	43.7204	94.3736	85.0479
15	100	53.9866	84.0151	63.4958	96.4044	84.5477
16	75.9616	28.0108	72.67	50.6681	69.9415	62.1648
17	100	35.0865	59.0024	86.1201	80.7076	37.6508
18	88.2763	95.0715	86.4205	77.2311	79.0008	32.2306
19	100	100	61.8741	62.2933	66.3047	45.8499
20	75.8172	100	56.9555	100	76.2546	72.9694
21	100	86.4106	84.157	80.144	60.3735	49.7265
22	88.2663	100	58.4621	61.7871	92.4219	73.3734
23	73.5839	88.4165	70.5815	83.51	87.1197	80.2224
24	77.4214	69.6596	3.62285	16.8017	68.8908	62.3274
25	73.9264	60.4821	51.6879	76.7137	100	66.5359
26	94.7929	84.5269	23.5638	28.9426	96.5632	83.9129
27	61.7007	79.8047	39.4201	45.2242	74.1023	71.513
28	71.8323	89.084	69.9829	66.6049	91.6902	74.5756
29	59.7165	72.6851	9.77411	76.267	100	63.8649
30	100	90.4355	48.2793	100	84.289	87.901
31	100	92.6063
32	100	64.9591
33	80.5485	75.2682
34	91.7461	40.2912
35	86.8589	90.5609
36	100	70.0016
37	100	56.1158
38	87.2904	47.0118
39	24.3014	76.7582
40	89.9439	43.0961
HOA-PHC
ind #	wild type	sax-7(nj48)	HOAp::sax-7s; sax-7(nj48)	HOAp::sax-7l; sax-7(nj48)	PHCp::sax-7s; sax-7(nj48)	PHCp::sax-7l; sax-7(nj48)			Statistics: Mann-Whitney test
1	27.5194	100	81.1066	90.076	100	100			Group1	Group2	p-value
2	100	66.6603	85.6215	90.462	85.4194	100			sax-7(nj48)	HOAp::sax-7s; sax-7(nj48)	0.4933	ns
3	82.766	100	84.1343	90.2765	85.6126	100			sax-7(nj48)	HOAp::sax-7l; sax-7(nj48)	0.7074	ns
4	84.7127	80.7941	73.2238	36.0378	68.0031	55.6634			sax-7(nj48)	PHCp::sax-7s; sax-7(nj48)	0.6811	ns
5	52.9716	100	0	100	70.7698	50.6462			sax-7(nj48)	PHCp::sax-7l; sax-7(nj48)	0.6818	ns
6	100	100	100	81.3636	71.827	84.9064
7	84.2101	81.2539	86.825	86.9911	94.6409	94.0244
8	85.334	73.2064	100	38.9965	78.532	70.9037
9	77.1226	94.3418	100	77.5806	94.3125	51.3465
10	100	52.7557	100	94.368	78.3533	92.0089
11	29.6525	87.2427	75.1953	16.3972	86.3294	35.0087
12	100	77.3821	100	35.8601	94.4469	81.2354
13	100	84.1284	100	100	79.0949	100
14	91.6474	90.5233	79.5522	63.5158	90.1612	100
15	100	34.9335	86.1801	88.4342	89.7065	100
16	80.4304	71.0599	85.5042	0	76.9382	63.3565
17	100	58.251	12.1055	82.93	76.0571	49.4242
18	67.6802	90.5324	66.3749	73.4933	96.2128	35.4671
19	83.1184	66.9747	51.337	13.0187	92.9756	66.1146
20	75.8024	70.468	75.1588	59.9965	78.6819	61.2517
21	88.0012	100	96.5297	100	50.8949	58.2214
22	100	100	50.3274	100	93.0981	100
23	55.0025	76.3084	49.4474	88.3999	68.8624	86.9055
24	79.1961	87.9	0	86.6378	81.2482	88.8541
25	73.848	71.8736	66.1504	77.6846	100	89.2643
26	98.2212	91.3796	79.6395	0	59.2273	100
27	84.6198	84.1048	50.5371	86.1167	73.0136	84.1373
28	69.7733	70.1443	82.1035	88.3835	100	88.6123
29	100	84.5451	51.6757	94.4215	100	100
30	87.1118	88.4276	100	82.5415	35.1406	94.2077
31	85.8168	100
32	86.3311	93.7012
33	80.5485	76.9895
34	87.0643	79.8669
35	85.8096	100
36	82.0752	86.0758
37	71.4823	61.6942
38	35.0963	26.4008
39	10.4206	67.3643
40	45.8461	35.3249

## Sheet: Fig6H
Figure 6H. % axon-axon contact
HOA-AVG
	PHC ablation
	wild type		casy-1(tm718)		rig-6(ok1589)				Statistics: Mann-Whitney test
Ex[HOAp::sax-7s]	-	+	-	+	-	+				Group1	Group2	p-value
ind #									wild type	-	Ex[HOAp::sax-7s]	0.0411
1	58.3532	58.8464	14.7541	19.0039	81.469	82.1199			casy-1(tm718)	-	Ex[HOAp::sax-7s]	0.015
2	76.3528	86.1565	14.2157	83.8544	66.9262	78.0736			rig-6(ok1589)	-	Ex[HOAp::sax-7s]	0.7658	ns
3	80.6403	80.6439	81.7547	51.2498	83.3844	59.1903
4	56.8859	93.1095	0	39.2142	53.8144	37.3674
5	100	71.064	38.6874	45.3558	81.4548	66.2362
6	100	88.722	55.8017	100	63.3901	38.6154
7	70.4444	80.6973	51.6438	100	69.1105	55.2894
8	69.107	100	30.4547	88.5624	52.3886	50.6447
9	54.6169	76.8675	58.2085	85.3171	82.9585	87.3288
10	74.2394	85.2017	54.775	100	61.5741	90.9969
11	100	81.7354	93.8496	81.2549	64.7004	67.1889
12	62.7057	87.5056	62.4683	71.12	68.7211	58.3708
13	55.4565	96.5728	29.0675	100	63.4946	92.9287
14	43.9404	67.9084	100	85.741	76.9887	90.9964
15	19.0997	69.5024	33.2756	70.5451	49.0996	87.5417
16		63.9973	67.7987		69.0223
17		81.077			85.0017
