# Supplementary material for: Multiple conserved cell adhesion protein interactions mediate neural wiring of a sensory circuit in C. elegans
Source: eLife. 2017 Sep 13;6:e29257. doi: 10.7554/eLife.29257 (PMC5619950; doi:10.7554/eLife.29257)
Supplement: Figure 7—source data 1. [file elife-29257-fig7-data1.xlsx]

## Sheet: Fig7A
Figure 7A. Vulva location efficiency
ind #	wild type	nlg-1(ok259)	casy-1(tm718)	casy-1(tm718); AVGp::casy-1	rig-6(ok1589)	rig-6(ok1589); AVGp::rig-6	bam-2(cy6)	bam-2(cy6); HOAp::bam-2	sax-7(nj48)	sax-7(nj48); PHCp::sax-7s	rig-6;casy-1	casy-1;bam-2	rig-6;sax-7			Statistics: Mann-Whitney test
1	1	1	0.333333	1	0.5	1	0.5	0.333333	0	0.25	1	0.5	0			Group1	Group2	p-value
2	0.5	0.5	0.333333	1	1	0.166667	0.5	1	0	0.25	1	1	0			wild type	nlg-1(ok259)	0.2606	ns
3	0.333333	0.5	0.5	1	0	1	0.125	1	0	1	1	0.5	0.5			wild type	casy-1(tm718)	<0.0001
4	0.5	1	0.25	0.5	0.1	1	0.333333	1	0	0.5	0.25	0.25	0			wild type	rig-6(ok1589)	0.0002
5	0.166667	0.5	0	0.333333	0.166667	1	0.333333	1	0	0.333333	0	0.111111	0.071429			wild type	bam-2(cy6)	<0.0001
6	1	0.333333	1	0.5	0.2	0.333333	0.2	0.5	0.2	1	0.25	0.5	0			wild type	sax-7(nj48)	<0.0001
7	0.333333	0.5	1	1	0.25	0.5	1	0.5		0.25	0.25	0.25	0			wild type	rig-6;casy-1	<0.0001
8	0.5	1	0.5	1	1	1	0.333333	1		0.5	0.2	1	0			wild type	casy-1;bam-2	0.0004
9	0.25	1	1	0	0.066667	0.5	0	0		0.25	0.5	0.25	0			wild type	rig-6;sax-7	<0.0001
10	1	1	1	0.333333	0.5	1	0.5	1		0.5	0.166667	0.5	0			casy-1(tm718)	casy-1(tm718); AVGp::casy-1	0.0047
11	0.5	0.5	0.25	0.125	0.166667	1	1	0		0.25	0.5	1	0			rig-6(ok1589)	rig-6(ok1589); AVGp::rig-6	0.0409
12	0.5	1	0.111111	1	0.166667	0.125	0.2	1		0.2	0.25	0	0			bam-2(cy6)	bam-2(cy6); HOAp::bam-2	0.001
13	1	1	0.111111	0.5	0.333333	0.5	0.076923	0		0.5	0.5	0.166667	0.166667			sax-7(nj48)	sax-7(nj48); PHCp::sax-7s	0.0007
14	1	1	0.5	1	0.5	0.5	0.052632	0.5		0.5	0.333333	1
15	0.111111	1	0	0.5	0	1	0.5	0.5		1	0.083333	0.0625
16	0	0.5	1	0.5	1	1	0.2	0.5		0.5	0.125	0.25
17	1	1	1	0.142857	0.333333	0.5	1	1		1	0.125	1
18	1	1	0	0.5	0.333333	1	0.1	1		1	0.2	1
19	1	1	0.25	0.25	0.2	0.166667	0.5	1		1	0.125	0.333333
20	1	0.333333	0	1	0.5	0.333333	1	1		0	0.043478	0.25
21	0.25	0.5	0.5	0.25	1	0.333333	0.166667	1		1	0	0.5
22	0.5	1	0.5	0.125	0.25	1	0.125	1		0.2	0.5	0.5
23	1	1	0.2	1	1	1	0	0.333333		1	0.5	0.1
24	1	1	0	0.5	0.2	0.333333	0.333333	0.5		0.5	0.2	0.5
25	1	1	0	0.5	0.333333	0.2	0.25	1		0.5	0.333333	1
26	0.5	1	0.5	1	1	0.333333	1	1		0	1	0.5
27	1	0.333333	1	0.5	0	0.2	0.5	0.5		0	0.333333	0.5
28	1	1	0.333333	1	0.5	0.5	0	1		0	0.2	0.5
29	1	1	1	0.25	1	1	0.125	0.5		0	1	0.142857
30	0.5	0.5	0.2	1	1	0.5	0.5	0.25		0.5	0.25	0.333333
31	1		0.066667		1	1				0.5	1
32	1		0.5		0.083333	1				0.2	1
33	1		0.111111		0.142857	0.25				0.2	0.333333
34	1		0.25		1	1				0.5	1
35	1		0.055556		1	0.5				0.111111	1
36	0.333333		0.1		0.333333	1				0	0.25
37	1		0.5		1	0.5					1
38	0.5		0.2		1	0.5					0.166667
39	1		0.166667		0.166667						0.1
40	1		1		0.333333						0.166667
41	1		0.5		0.333333						0.333333
42	1		1		1						0.125
43	1		0.1		0.5						1
44	0.5		0.5		1						0.25
45	1		0		0.166667
46	1		0.142857		0.333333
47	1		0		1
48	0.5		0.111111
49	0.333333
50	1
51	0.333333
52	0.333333
53	0
54	1
55	1
56	0.5
57	0.2
58	0.333333
59	0.5
60	0.2
61	0.5
62	0.2
63	0.5
64	1
65	0.5
66	1
67	0.333333
68	1
69	1
70	0.5
71	1
72	1
73	1
74	1
75	0.5
76	1
77	1
78	1
79	0.5
80	1
81	0.5
82	0.5
83	1
84	0.5
85	0.5
86	0.333333
87	0.5
88	1
89	1
90	0.5
91	0.5
92	1
93	1
94	1
95	1
96	1
97	0.5
98	1
99	0.5
100	1

## Sheet: Fig7B
Figure 7B. Response efficiency
ind #	wild type	nlg-1(ok259)	casy-1(tm718)	casy-1(tm718); AVGp::casy-1	rig-6(ok1589)	rig-6(ok1589); AVGp::rig-6	bam-2(cy6)	bam-2(cy6); HOAp::bam-2	sax-7(nj48)	sax-7(nj48); PHCp::sax-7s	rig-6;casy-1	casy-1;bam-2	rig-6;sax-7			Statistics: Mann-Whitney test
1	1	1	0.5	1	1	1	1	1	0	1	1	1	0			Group1	Group2	p-value
2	1	1	0.25	0	1	1	1	1	0	1	0.5	1	0.5			wild type	nlg-1(ok259)	0.1129	ns
3	1	1	1	1	1	1	1	1	0	1	1	1	0			wild type	casy-1(tm718)	0.0771	ns
4	0.5	1	1	1	1	1	1	1	0	0.5	1	1	0			wild type	rig-6(ok1589)	0.5374	ns
5	0.5	0.25	0.5	1	1	1	1	1	0	0.5	1	1	0			wild type	bam-2(cy6)	0.285	ns
6	1	1	1	1	1	1	1	1	0	1	0.5	1	0			wild type	sax-7(nj48)	<0.0001
7	1	1	1	1	1	0.333333	0.5	1	0.5	1	1	0.5	0.2			wild type	rig-6;casy-1	0.0745	ns
8	1	1	0.5	1	1	1	0.5	1	0	1	1	1	0			wild type	casy-1;bam-2	0.285	ns
9	1	1	1	1	1	1	1	1	0.5	0.5	1	1	0			wild type	rig-6;sax-7	<0.0001
10	1	1	1	1	0.5	1	1	0.5	0	0.2	1	1	0			sax-7(nj48)	sax-7(nj48); PHCp::sax-7s	<0.0001
11	1	1	1	1	1	1	1	0.5	0.25	0.5	1	1	1
12	1	1	1	1	1	1	1	1	1	0.25	1	1	1
13	1	1	1	1	0.5	1	1	1	0	1	1	1	1
14	1	1	0.5	1	1	1	1	1	0	1	1	1	0
15	1	1	1	1	1	1	1	1	0	1	1	1	0.5
16	0.2	1	0.5	1	1	1	1	1	0	1	1	1	0
17	0.5	1	1	0.5	1	1	1	0.5	0	1	1	1	0.5
18	0.5	1	0.333333	1	1	1	1	1	0	0.25	1	0.5	0.5
19	1	1	1	1	1	1	1	1	0	1	1	1	0
20	0.5	1	0.166667	1	1	1	1	1	0.2	0.333333	1	1	1
21	0.25	1	1	1	1	1	1	1	0	1	1	1	1
22	0.25	1	1	1	1	1	1	1	0	1	1	1	0.5
23	1	1	0.5	1	1	1	1	1	0	0.333333	1	1	0.5
24	1	1	0	1	1	1	1	1	0	1	1	1	0.2
25	1	1	1	1	1	1	1	1	0	1	1	1	0.25
26	1	1	0.5	1	1	0.5	1	1	0	0.5	1	1	1
27	1	1	1	1	0.5	1	1	1	0	1	1	1	0.25
28	1	1	1	1	1	1	1	1	0	0.5	1	1	0
29	1	1	1	1	1	1	1	1	0	0.2	1	1	0
30	1	1	1	1	1	0.2	1	1	0	1	1	1	1
31	1		0.5		1	1			0.25	1	1
32	0.5		1		1	1			0	0.25	1
33	0.5		0.5		1	1			0.333333	1	1
34	1		1		1	0.2			0.5	0.5	1
35	1		1		1	1			0	1	1
36	1		1		1	1			0	0.333333	1
37	1		1		1	1			0.25		1
38	1		1		1	1			0.333333		1
39	1		1		1	1			0		1
40	1		1		1	0.5			0		1
41	0.5		1		0.333333				0		1
42	1		1		1				0		1
43	1		1		1				0		1
44	1		1		1				0		1
45	1		1		0.333333				0
46	1		1		1
47	1		1		1
48	0.5		1
49	1
50	1
51	1
52	1
53	0.5
54	1
55	1
56	1
57	1
58	1
59	1
60	1
61	1
62	1
63	1
64	1
65	1
66	1
67	1
68	0.333333
69	1
70	1
71	1
72	1
73	1
74	1
75	1
76	1
77	1
78	1
79	1
80	1
81	1
82	1
83	1
84	1
85	1
86	1
87	1
88	1
89	1
90	1
91	1
92	1
93	1
94	1
95	1
96	1
97	1
98	1
99	0.5
100	1
