# Supplementary material for: Multiple conserved cell adhesion protein interactions mediate neural wiring of a sensory circuit in C. elegans
Source: eLife. 2017 Sep 13;6:e29257. doi: 10.7554/eLife.29257 (PMC5619950; doi:10.7554/eLife.29257)
Supplement: Supplementary file 1. [file elife-29257-supp1.xlsx]

## Sheet: Table
Supplementary File 1. Neighborhood and synapse in the HOA-AVG-PHC circuit
		: contact				: synapse
Section #	Image #	HOA > AVG	HOA > PHC	PHC > AVG	PHC > HOA	All three	HOA Mito. #		Section #	Image #	HOA > AVG	HOA > PHC	PHC > AVG	PHC > HOA	All three	HOA Mito. #		Section #	Image #	HOA > AVG	HOA > PHC	PHC > AVG	PHC > HOA	All three	HOA Mito. #
13836	165							PHC ends	13916	245						0		13996	325						0
13837	166								13917	246						0		13997	326						0
13838	167								13918	247						0		13998	327						0
13839	168								13919	248						0		13999	328						0
13840	169								13920	249						0		14000	329						0
13841	170								13921	250						0		14001	330						0
13842	171								13922	251						0		14002	331						0
13843	172								13923	252						0		14003	332						0
13844	173								13924	253						0		14004	333						0
13845	174								13925	254						0		14005	334						0
13846	175								13926	255						1		14006	335						0
13847	176								13927	256						2		14007	336						0
13848	177								13928	257						2		14008	337						0
13849	178								13929	258						1		14009	338						0
13850	179								13930	259						0		14010	339						0
13851	180								13931	260						0		14011	340						1
13852	181								13932	261						0		14012	341						1
13853	182								13933	262						0		14013	342						1
13854	183								13934	263						0		14014	343						2
13855	184								13935	264						1		14015	344						1
13856	185								13936	265						1		14016	345						1
13857	186								13937	266						0		14017	346						1
13858	187								13938	267						0		14018	347						0
13859	188								13939	268						0		14019	348						0
13860	189								13940	269						0		14020	349						0
13861	190								13941	270						0		14021	350						0
13862	191								13942	271						0		14022	351						0
13863	192								13943	272						0		14023	352						0
13864	193								13944	273						0		14024	353						0
13865	194								13945	274						0		14025	354						0
13866	195								13946	275						0		14026	355						0
13867	196								13947	276						0		14027	356						0
13868	197								13948	277						0		14028	357						0
13869	198								13949	278						0		14029	358						0
13870	199								13950	279						0		14030	359						0
13871	200								13951	280						0		14031	360						0
13872	201								13952	281						0		14032	361						0
13873	202								13953	282						0		14033	362						0
13874	203								13954	283						0		14034	363						0
13875	204								13955	284						0		14035	364						0
13876	205								13956	285						0		14036	365						0
13877	206								13957	286						0		14037	366						0
13878	207								13958	287						0		14038	367						0
13879	208								13959	288						0		14039	368						0
13880	209								13960	289						0		14040	369						0
13881	210								13961	290						0		14041	370						1
13882	211								13962	291						0		14042	371						2
13883	212								13963	292						0		14043	372						2
13884	213								13964	293						0		14044	373						2
13885	214								13965	294						0		14045	374						3
13886	215								13966	295						0		14046	375						3
13887	216								13967	296						1		14047	376						3
13888	217								13968	297						2		14048	377						4
13889	218								13969	298						3		14049	378						4
13890	219								13970	299						3		14050	379						3
13891	220								13971	300						3		14051	380						3
13892	221								13972	301						4		14052	381						3
13893	222								13973	302						4		14053	382						3
13894	223								13974	303						3		14054	383						3
13895	224								13975	304						3		14055	384						3
13896	225								13976	305						3		14056	385						3
13897	226								13977	306						3		14057	386						3
13898	227								13978	307						3		14058	387						3
13899	228								13979	308						3		14059	388						2
13900	229								13980	309						3		14060	389						1
13901	230								13981	310						2		14061	390						1
13902	231								13982	311						1		14062	391						1
13903	232								13983	312						0		14063	392						0
13904	233								13984	313						0		14064	393						0
13905	234								13985	314						0		14065	394						0
13906	235						0	HOA ends	13986	315						0		14066	395						0
13907	236						0		13987	316						0		14067	396						0
13908	237						0		13988	317						0		14068	397						0
13909	238						0		13989	318						0		14069	398						0
13910	239						0		13990	319						0		14070	399						0
13911	240						2		13991	320						0		14071	400						0
13912	241						1		13992	321						0		14072	401						0
13913	242						1		13993	322						0		14073	402						0
13914	243						0		13994	323						0		14074	403						0
13915	244						0		13995	324						0		14075	404						0
Section #	Image #	HOA > AVG	HOA > PHC	PHC > AVG	PHC > HOA	All three	HOA Mito. #		Section #	Image #	HOA > AVG	HOA > PHC	PHC > AVG	PHC > HOA	All three	HOA Mito. #		Section #	Image #	HOA > AVG	HOA > PHC	PHC > AVG	PHC > HOA	All three	HOA Mito. #
14076	405						0		14162	491						1		14248	577						0
14077	406						0		14163	492						1		14249	578						0
14078	407						0		14164	493						0				HOA starts after PCA ending
14079	408						0		14165	494						1
14080	409						0		14166	495						1
14081	410						0		14167	496						2
14082	411						0		14168	497						2
14083	412						0		14169	498						1
14084	413						0		14170	499						1
14085	414						0		14171	500						1
14086	415						0		14172	501						0
14087	416						0		14173	502						0
14088	417						0		14174	503						0
14089	418						0		14175	504						0
14090	419						0		14176	505						0
14091	420						0		14177	506						0
14092	421						0		14178	507						0
14093	422						0		14179	508						0
14094	423						0		14180	509						0
14095	424						0		14181	510						0
14096	425						0		14182	511						0
14097	426						0		14183	512						0
14098	427						0		14184	513						0
14099	428						0		14185	514						0
14100	429						0		14186	515						0
14101	430						0		14187	516						0
14102	431						0		14188	517						1
14103	432						0		14189	518						1
14104	433						0		14190	519						0
14105	434						0		14191	520						0
14106	435						0		14192	521						0
14107	436						0		14193	522						0
14108	437						1		14194	523						0
14109	438						1		14195	524						0
14110	439						1		14196	525						0
14111	440						1		14197	526						0
14112	441						2		14198	527						0
14113	442						2		14199	528						0
14114	443						1		14200	529						0
14115	444						1		14201	530						0
14116	445						1		14202	531						0
14117	446						1		14203	532						0
14118	447						0		14204	533						0
14119	448						0		14205	534						0
14120	449						0		14206	535						0
14121	450						0		14207	536						0
14122	451						0		14208	537						0
14123	452						0		14209	538						0
14124	453						0		14210	539						0
14125	454						0		14211	540						0
14126	455						0		14212	541						0
14127	456						0		14213	542						0
14128	457						0		14214	543						0
14129	458						0		14215	544						0
14130	459						0		14216	545						0
14131	460						0		14217	546						0
14132	461						0		14218	547						0
14133	462						0		14219	548						0
14134	463						1		14220	549						0
14135	464						1		14221	550						0
14136	465						1		14222	551						0
14137	466						2		14223	552						0
14138	467						2		14224	553						0
14139	468						2		14225	554						0
14140	469						1		14226	555						0
14141	470						1		14227	556						0
14142	471						1		14228	557						1
14143	472						0		14229	558						2
14144	473						0		14230	559						2
14145	474						0		14231	560						1
14146	475						0		14232	561						1
14147	476						0		14233	562						1
14148	477						0		14234	563						1
14149	478						0		14235	564						1
14150	479						0		14236	565						1
14151	480						0		14237	566						0
14152	481						0		14238	567						0
14153	482						0		14239	568						0
14154	483						0		14240	569						0
14155	484						0		14241	570						0
14156	485						0		14242	571						1
14157	486						0		14243	572						1
14158	487						0		14244	573						1
14159	488						0		14245	574						1
14160	489						1		14246	575						1
14161	490						1		14247	576						1
