# Supplementary figures and images for: Multiple conserved cell adhesion protein interactions mediate neural wiring of a sensory circuit in C. elegans
Source: eLife journal article supplement (doi:10.7554/elife.29257), 2017-09-13

Figure 2—figure supplement 1

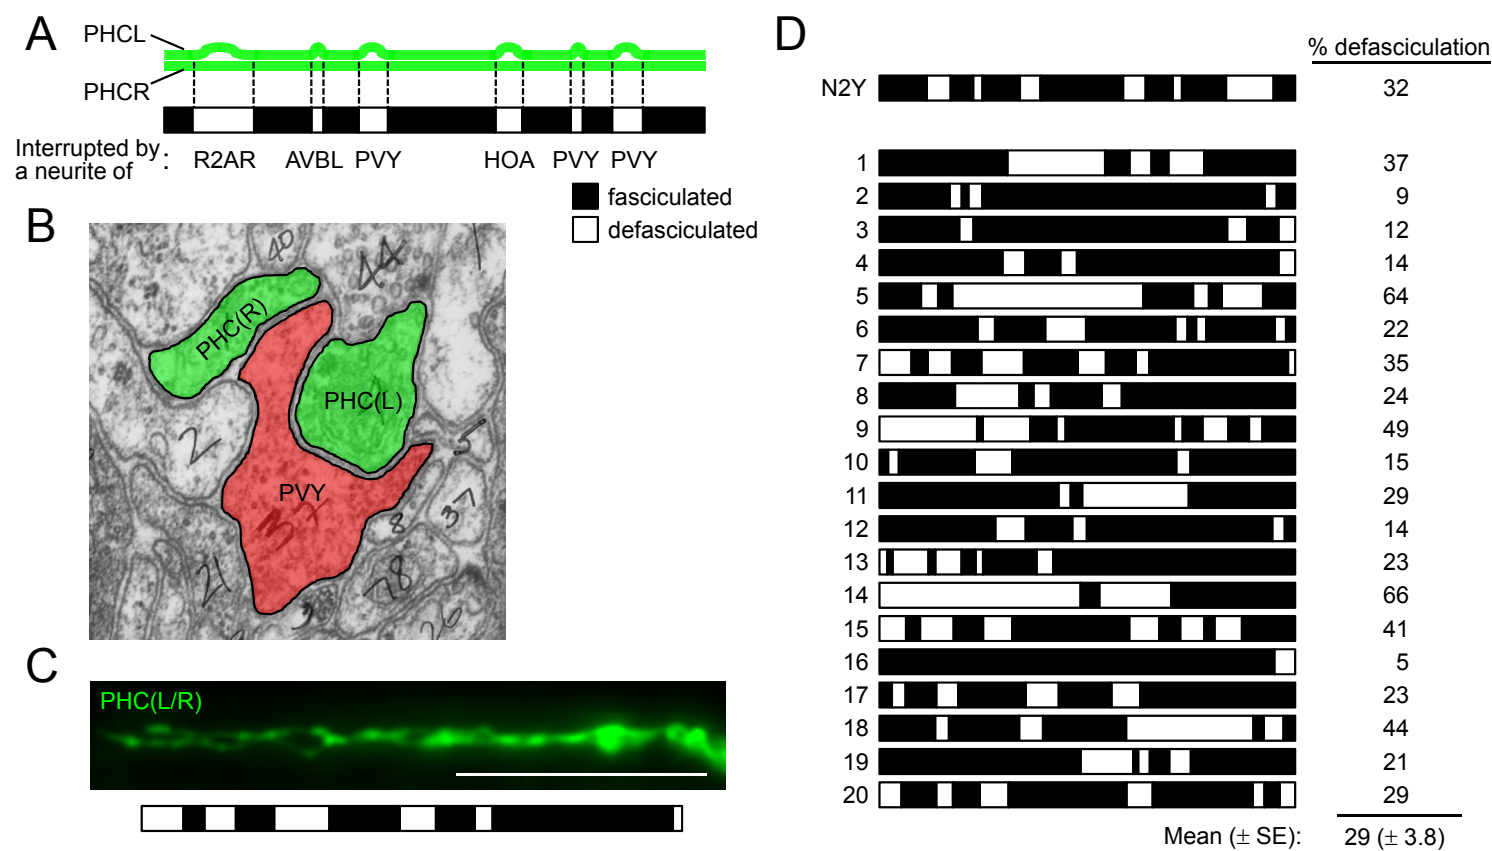

Supplement: supp [file elife-29257-supp-v1.zip]

Figure 1—figure supplement 3

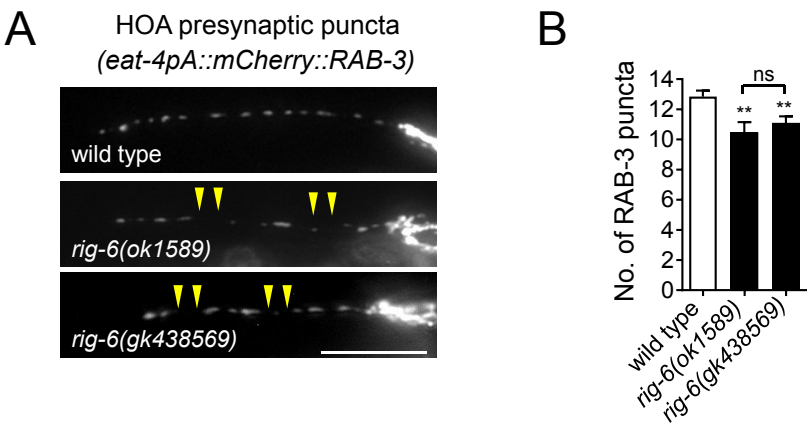

Supplement: supp [file elife-29257-supp-v1.zip]

Figure 5—figure supplement 2

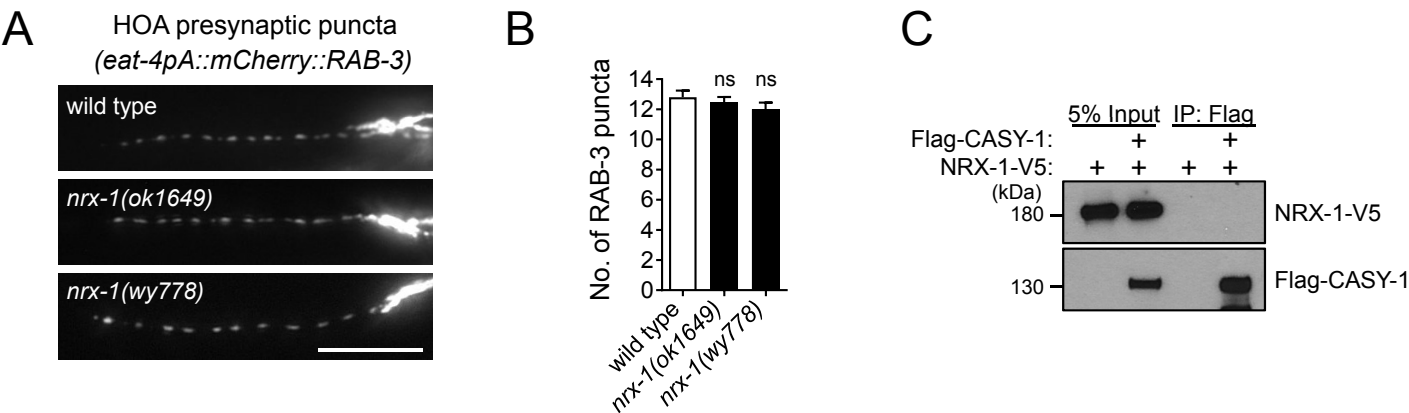

Supplement: supp [file elife-29257-supp-v1.zip]

Figure 1—figure supplement 2

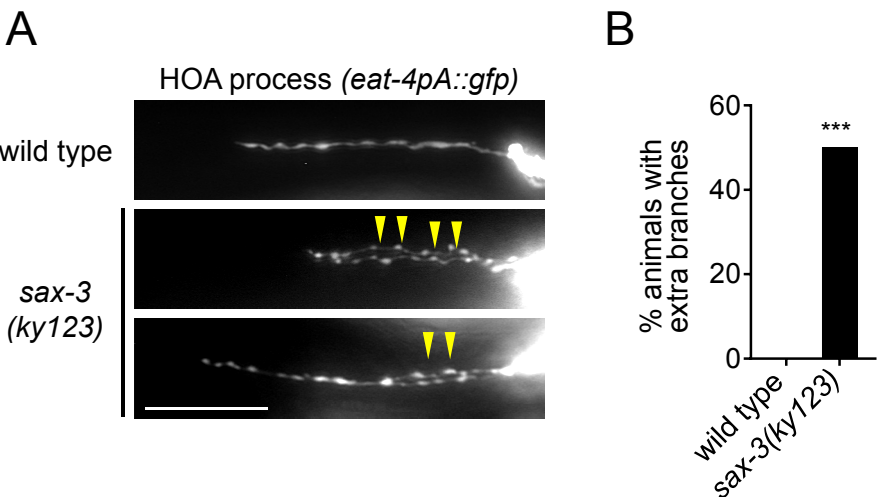

Supplement: supp [file elife-29257-supp-v1.zip]
